# Supplementary material
Source: MDPI journal article supplement (https://www.mdpi.com/2073-4344/13/11/1447)

## **Spectral copies of $^1\text{H}$ NMR, and $^{13}\text{C}$ NMR**

$^1\text{H}$  NMR chemical shifts are referenced to  $\text{CDCl}_3$  (TMS, 7.26 ppm).  $^{13}\text{C}$  NMR chemical shifts are referenced to  $\text{CDCl}_3$  (TMS, 77.00 ppm)

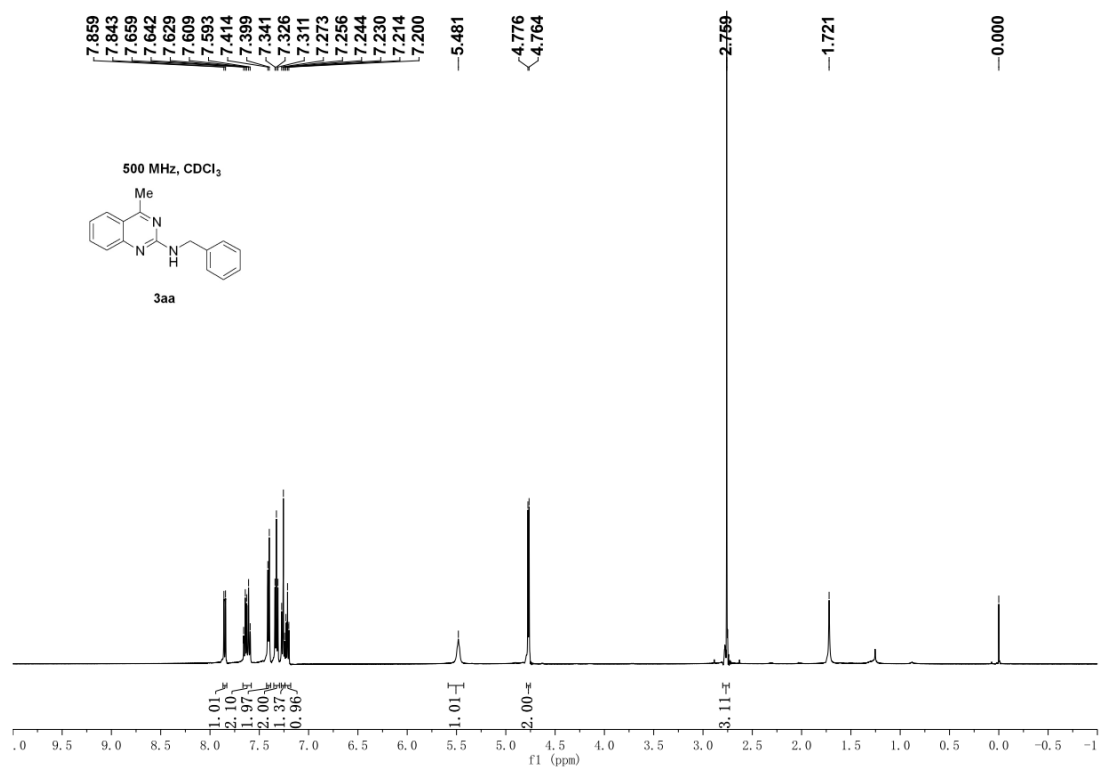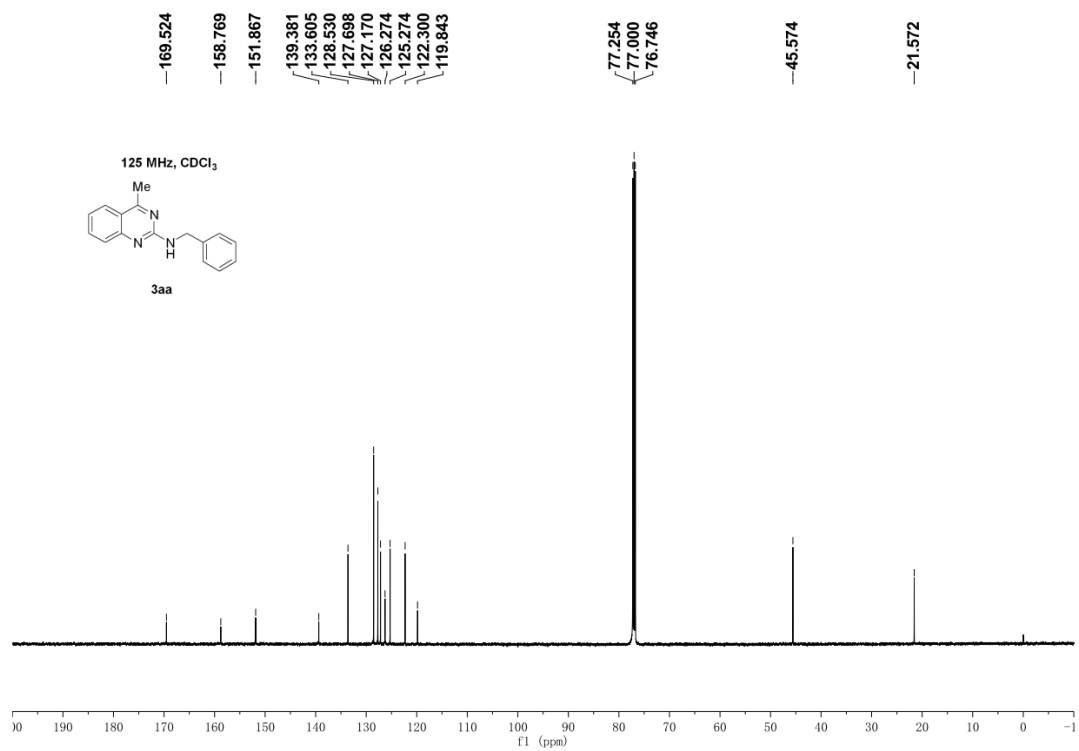

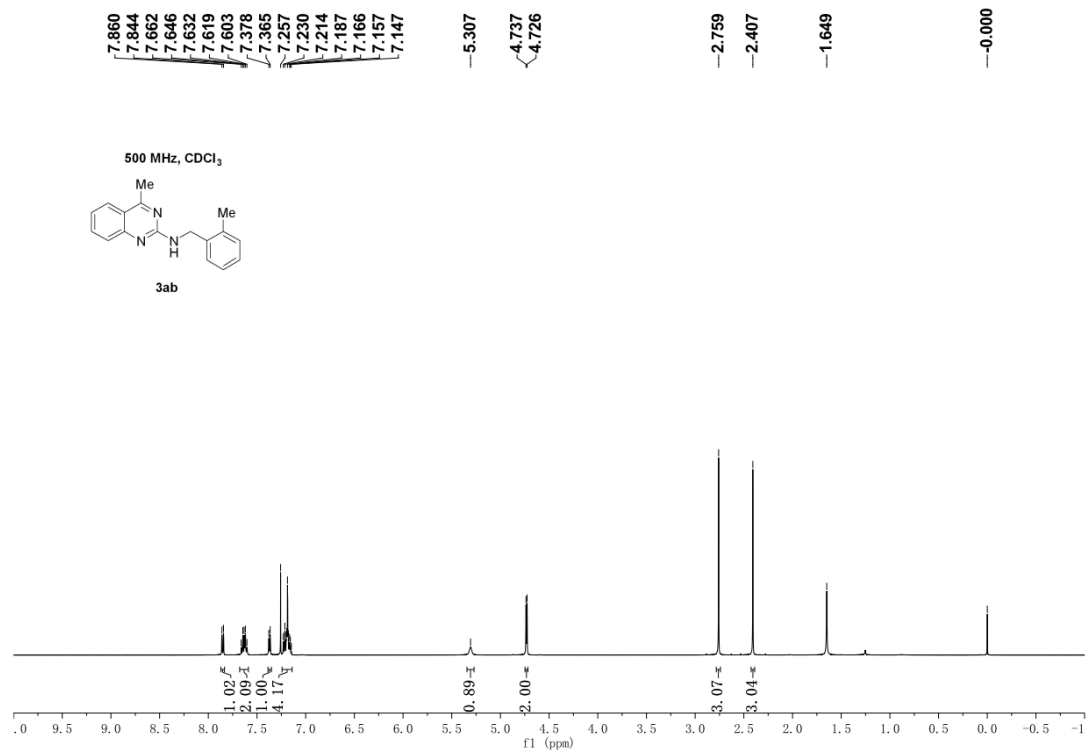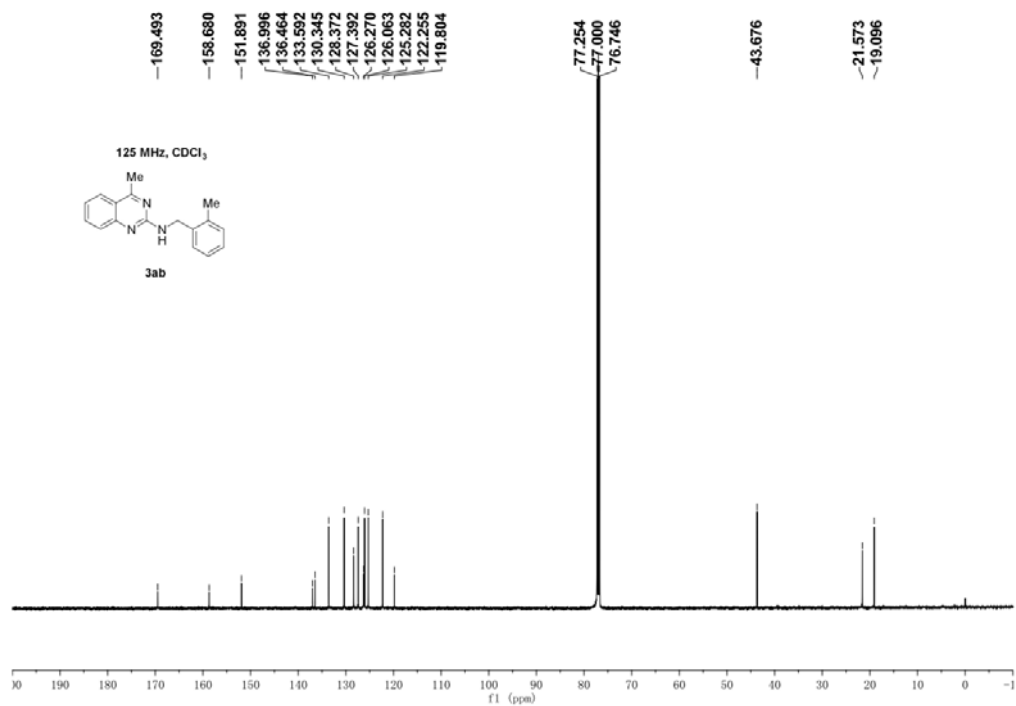

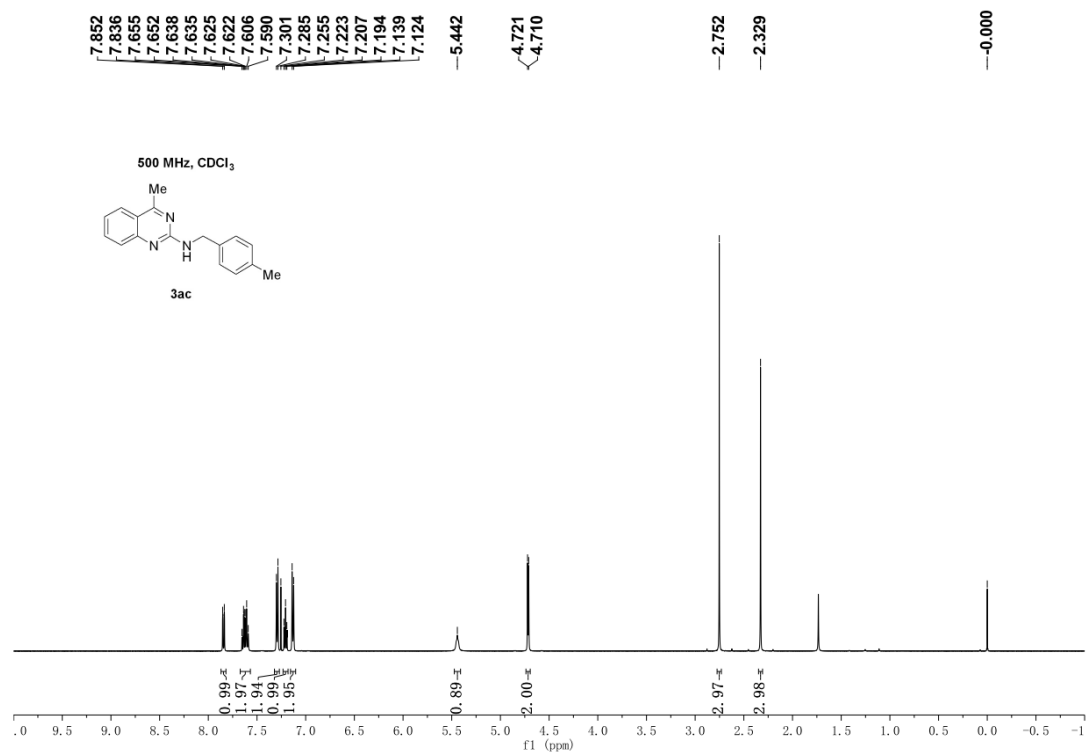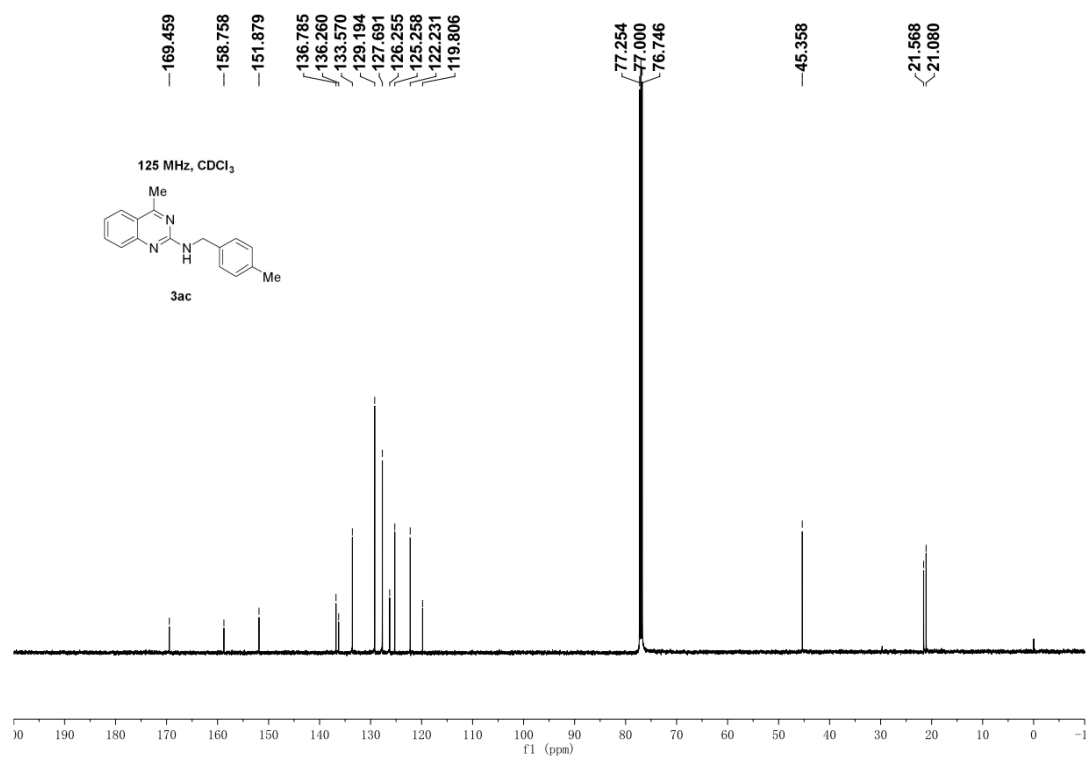

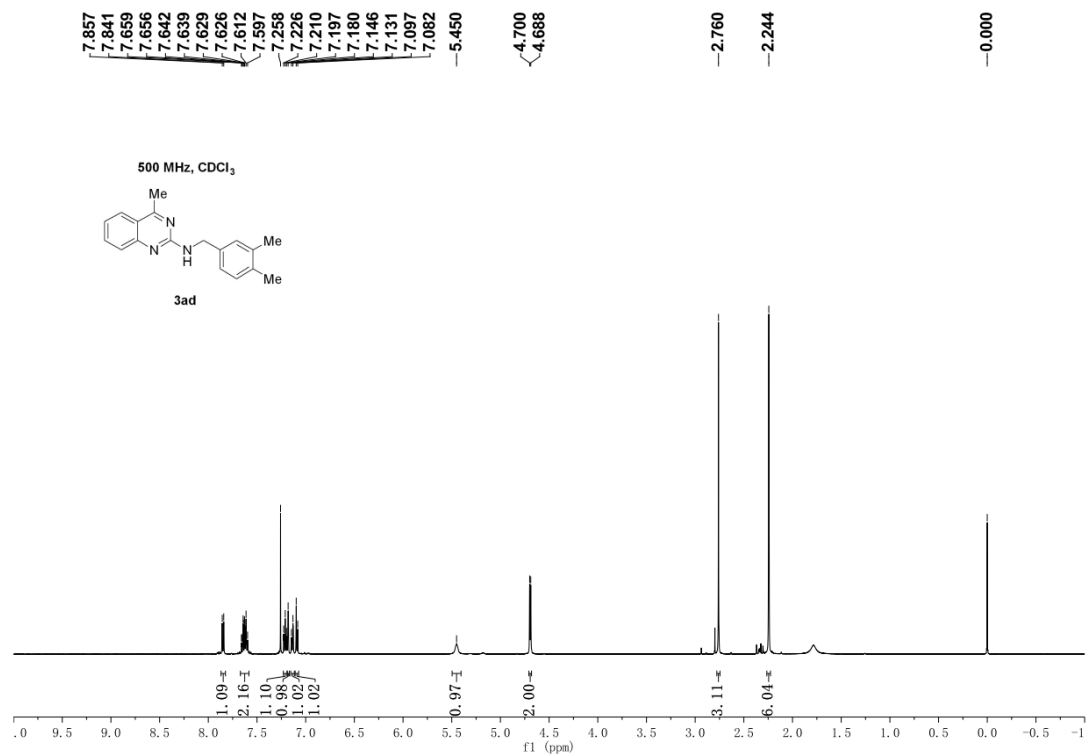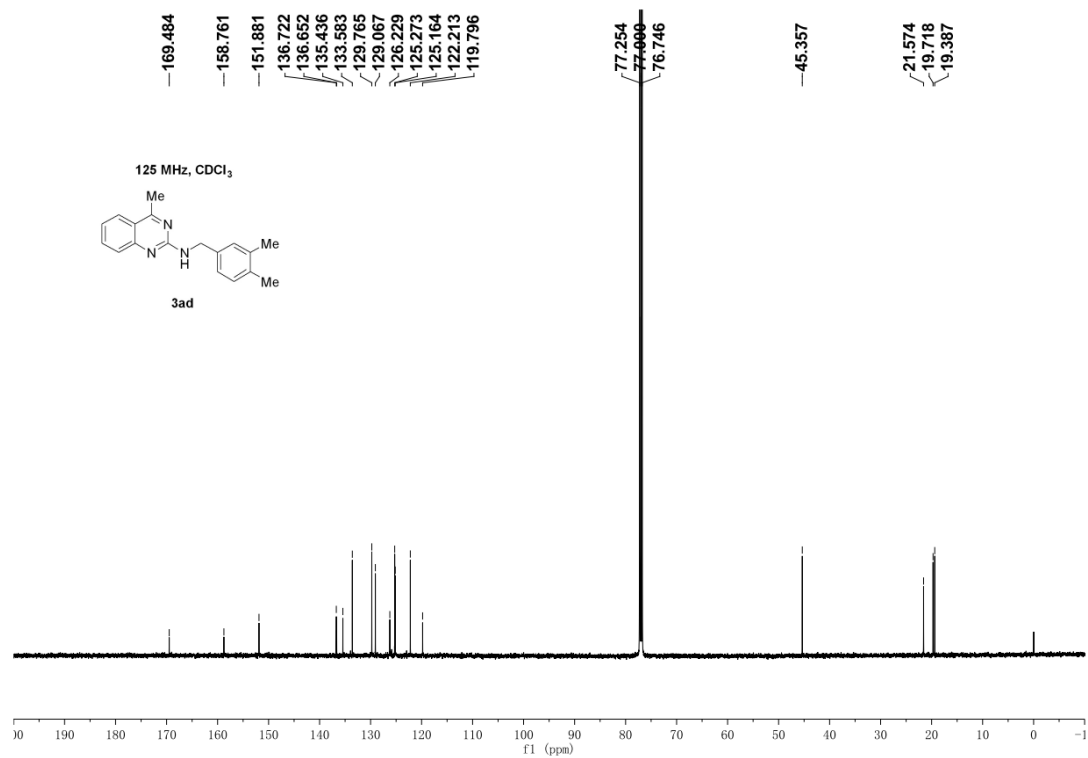

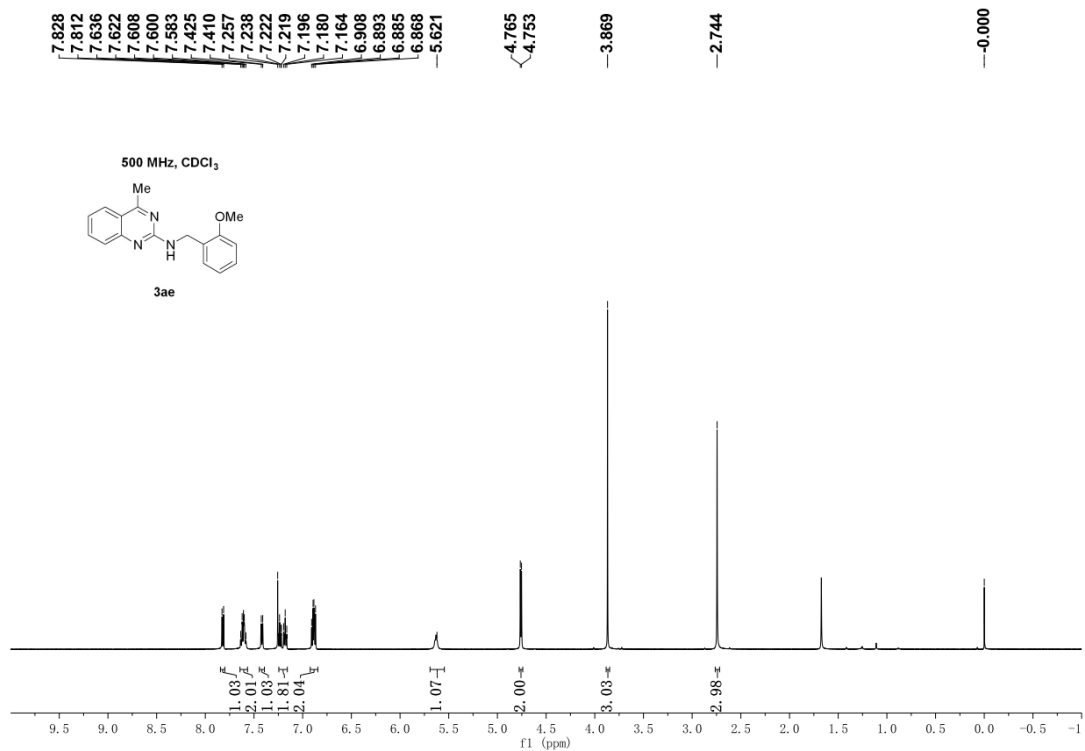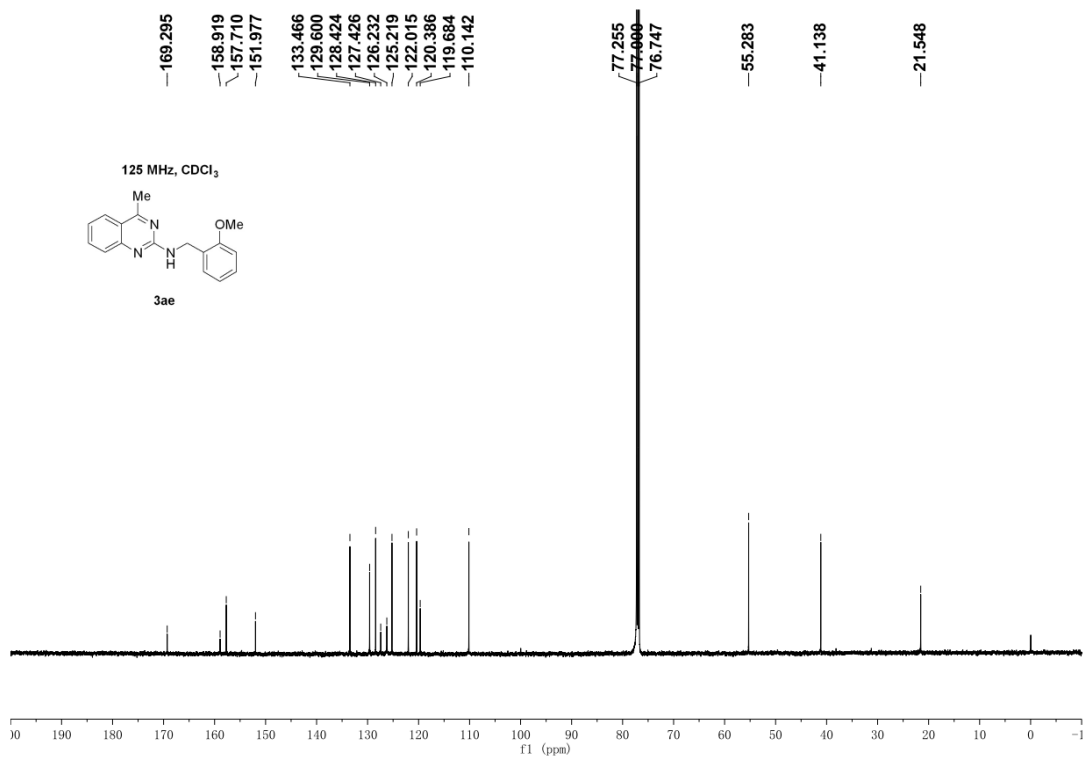

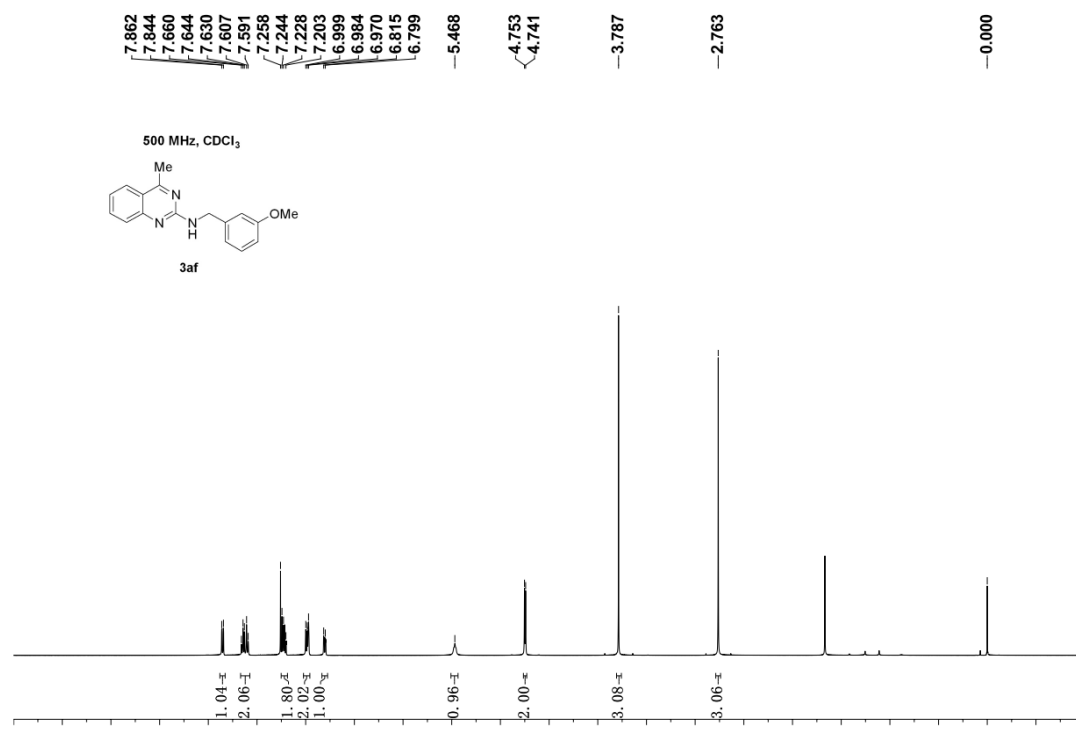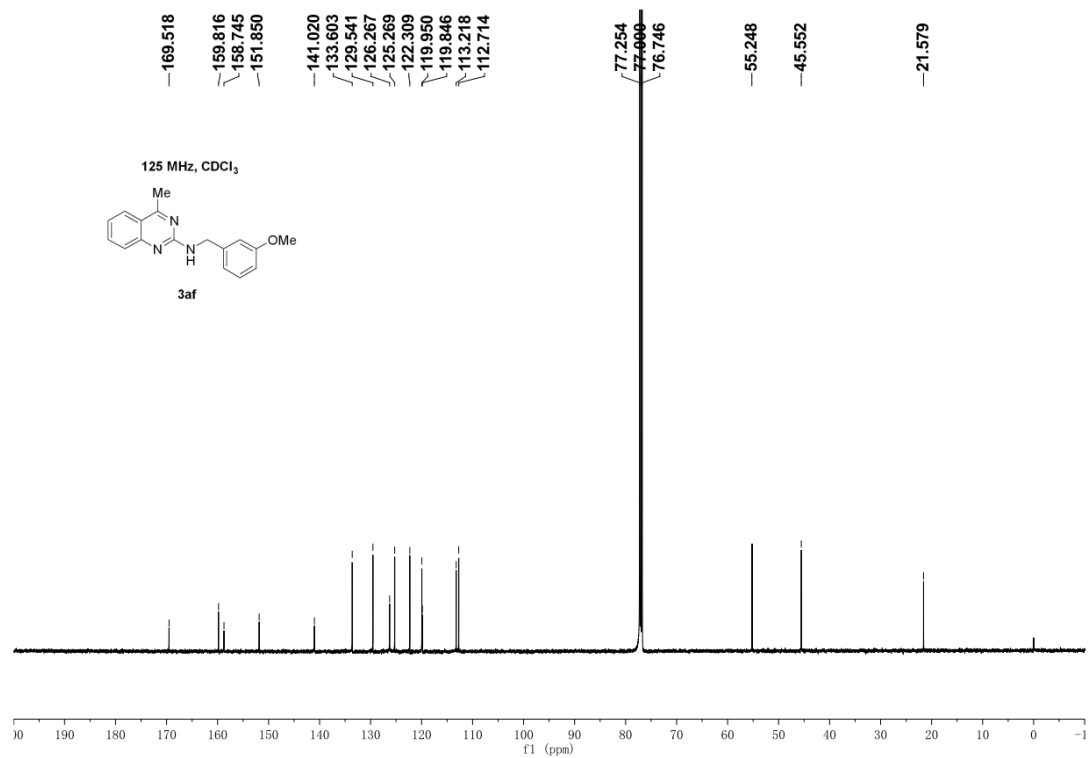

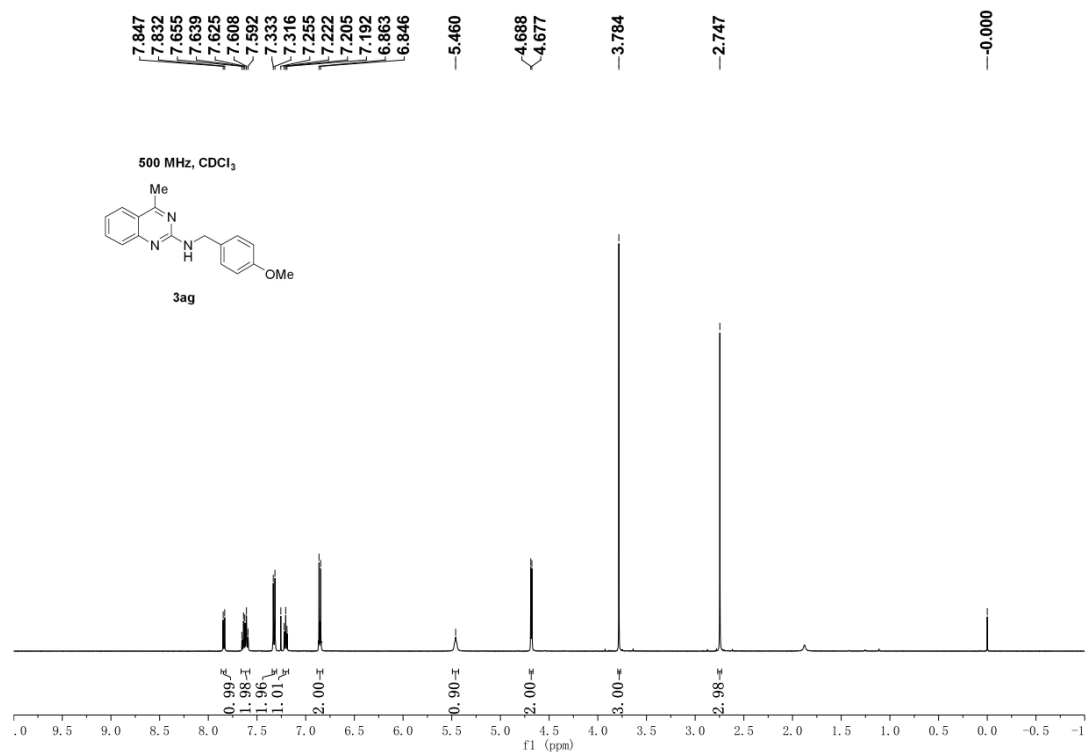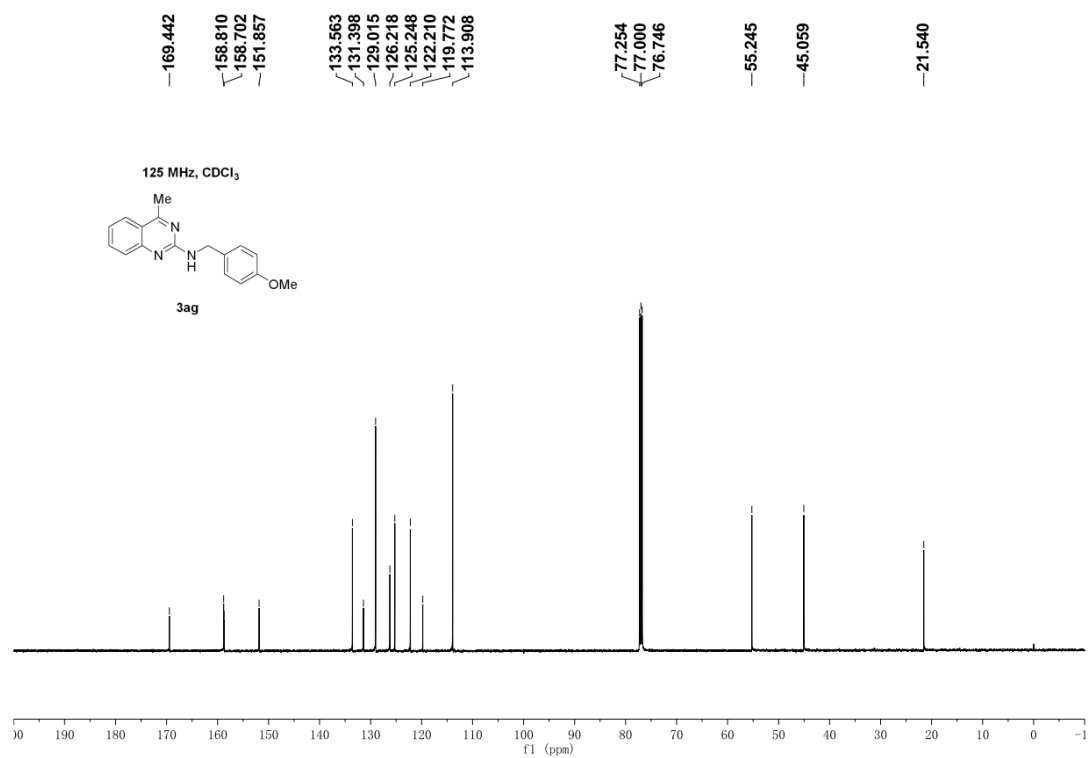



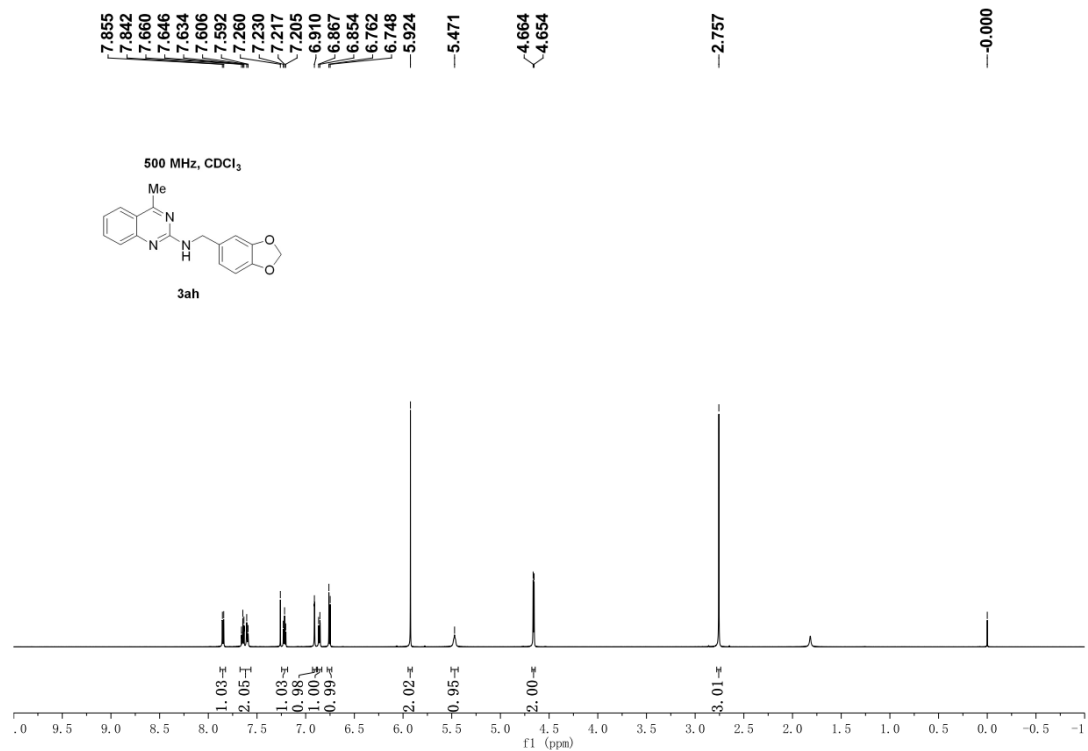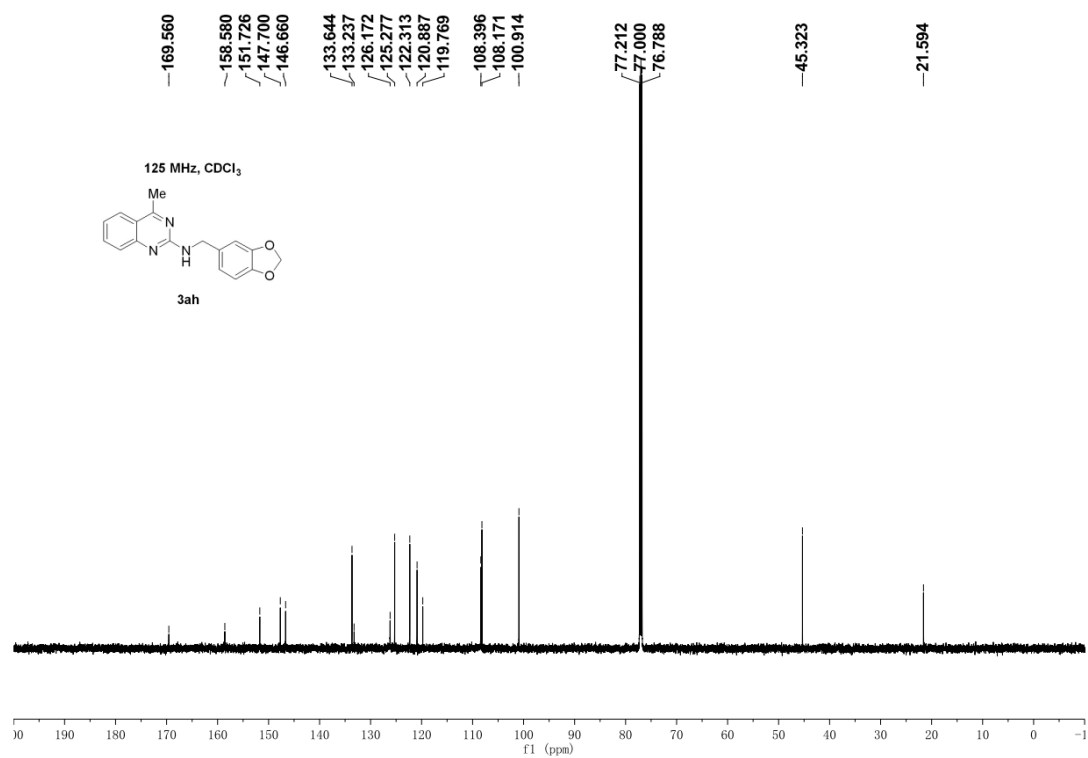

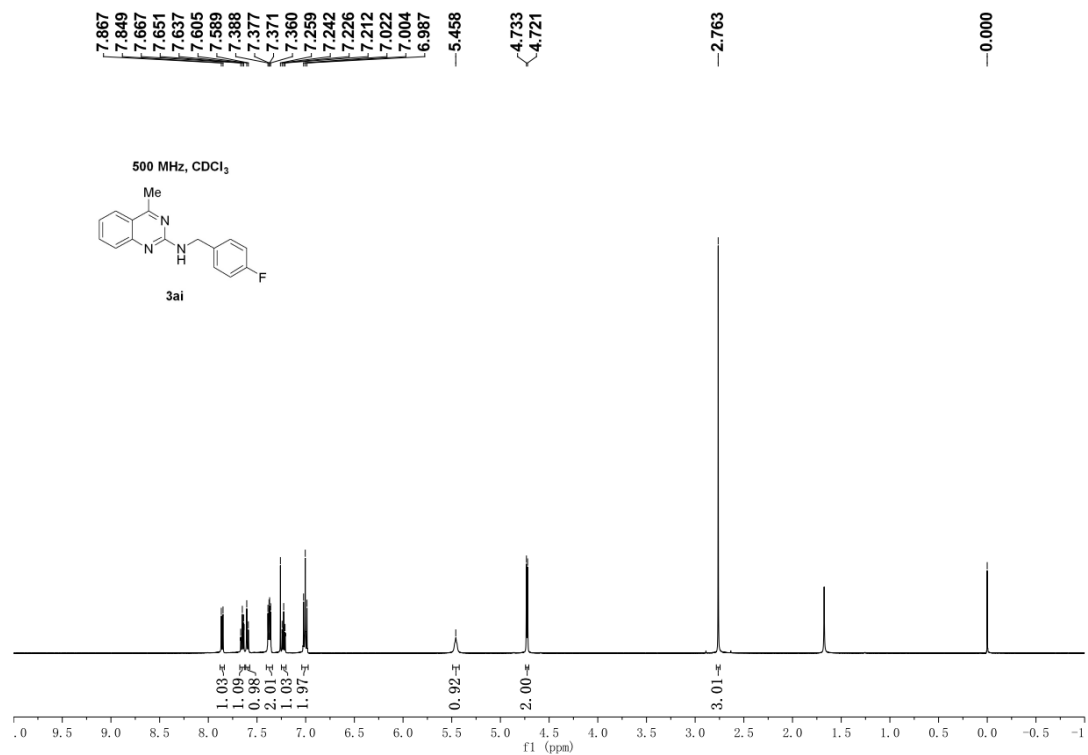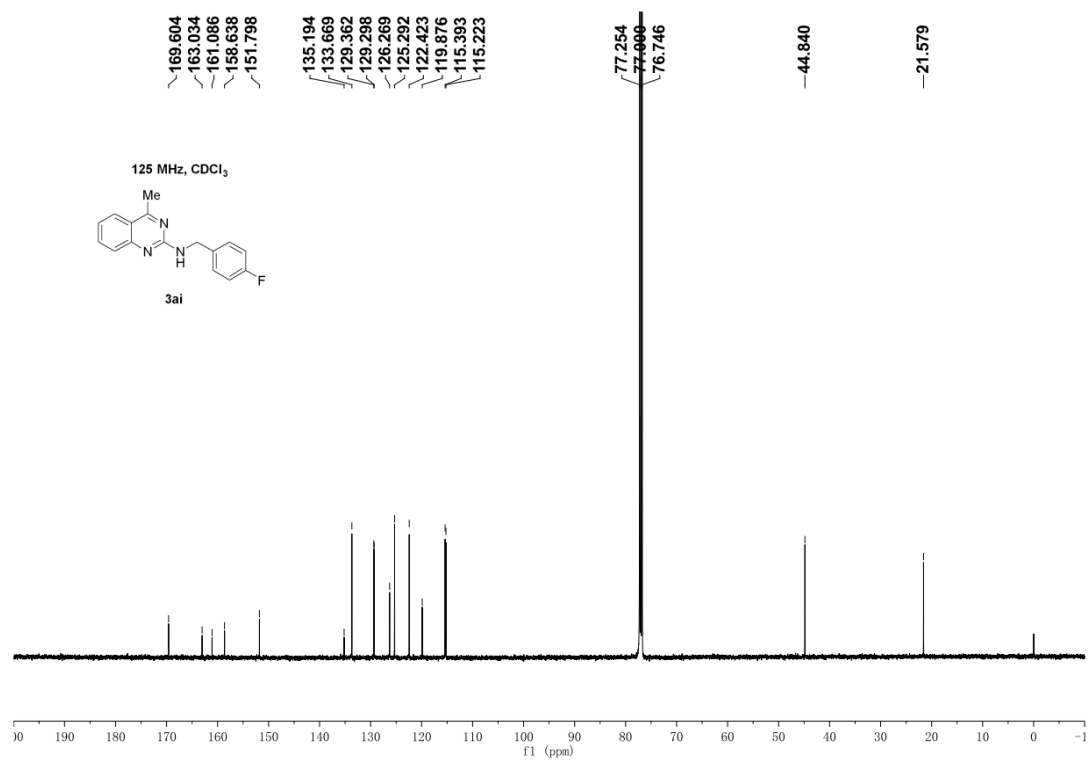

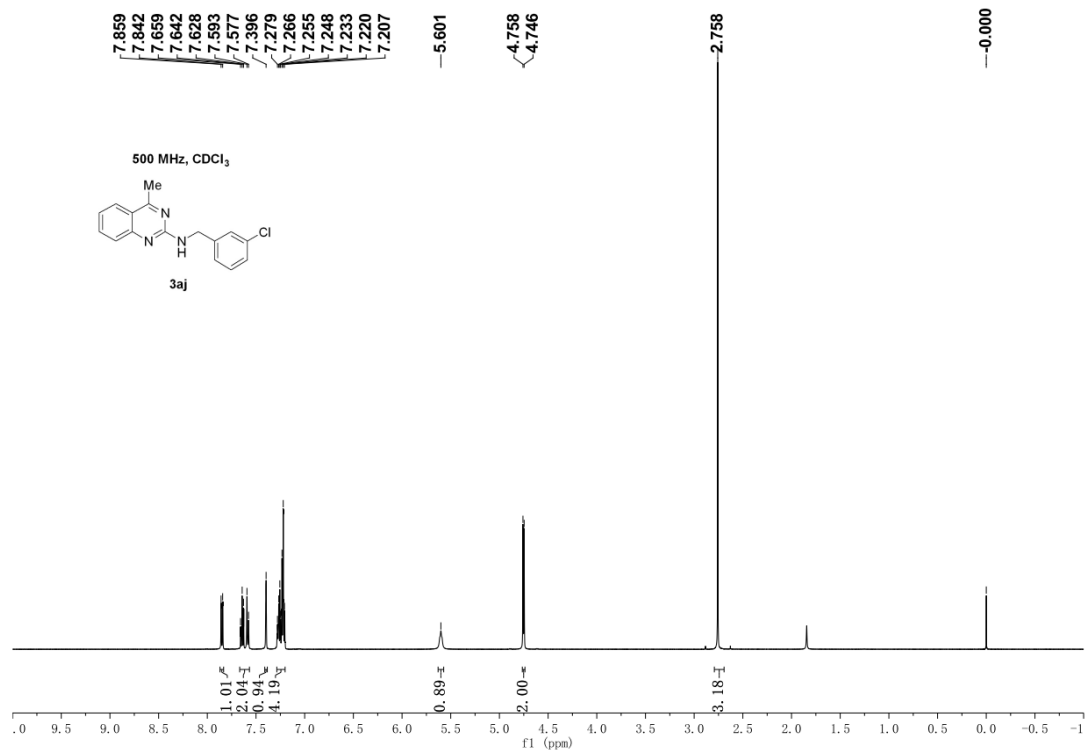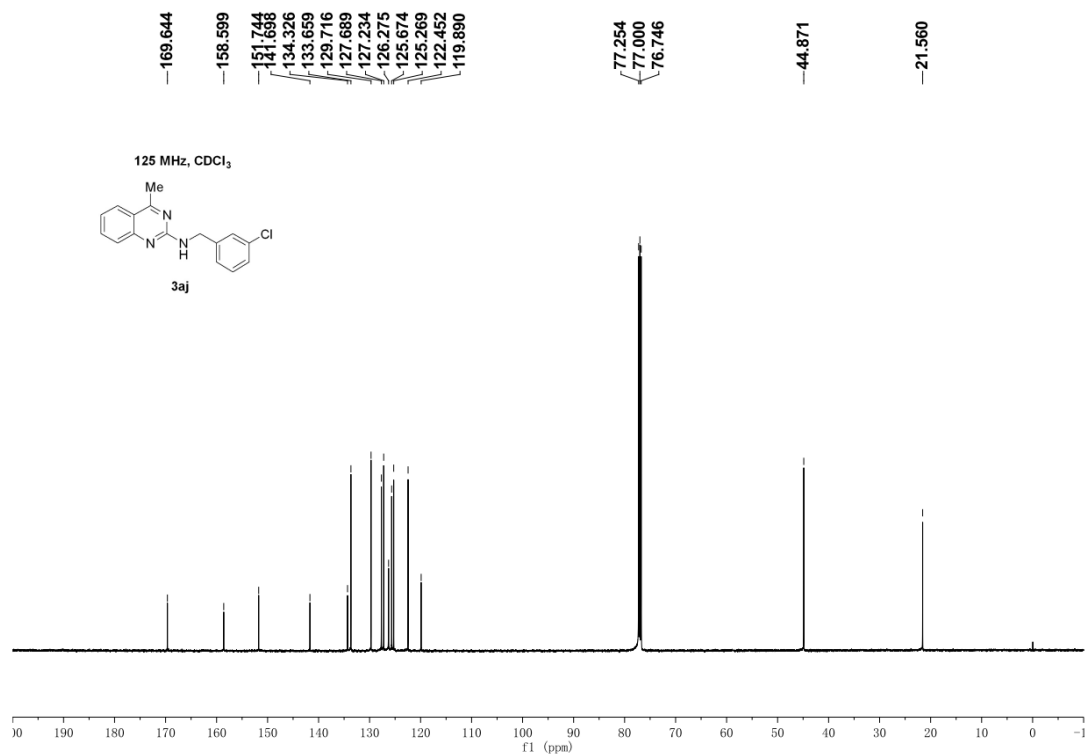

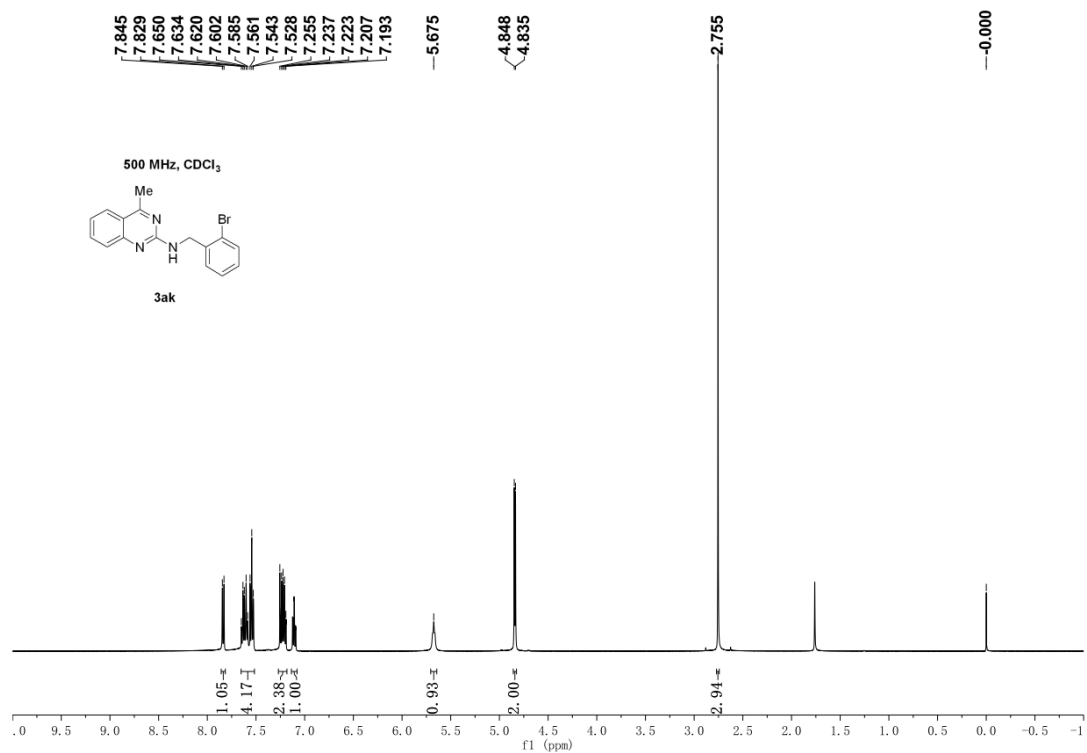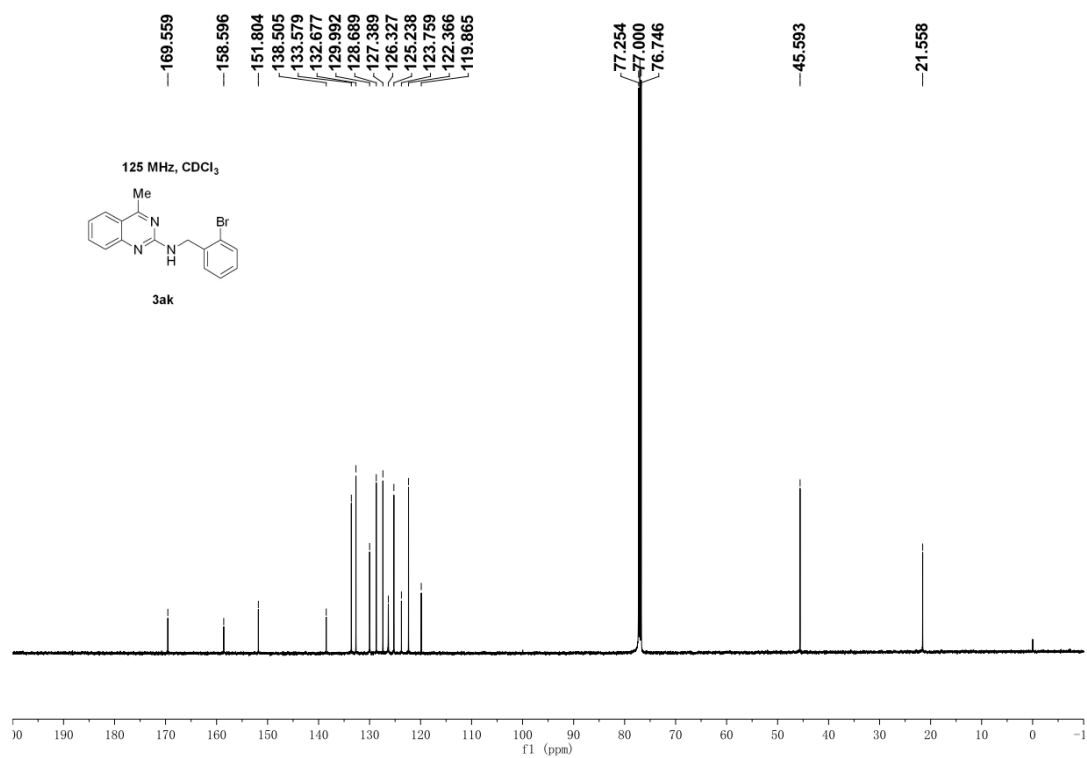

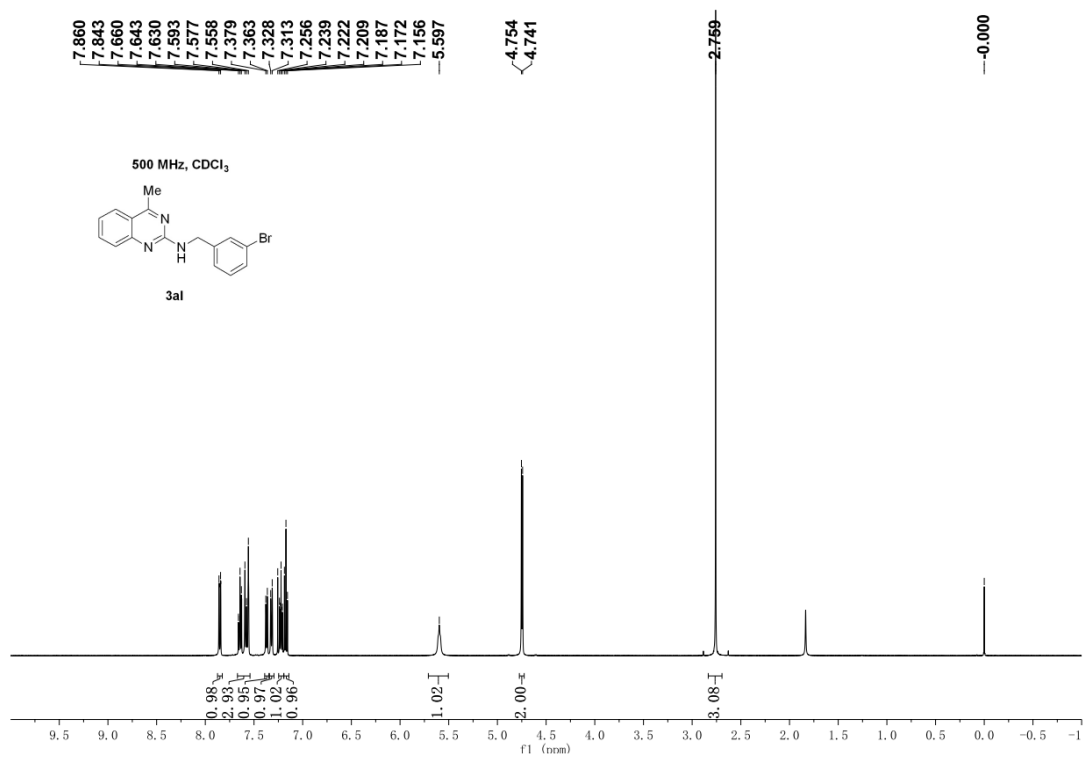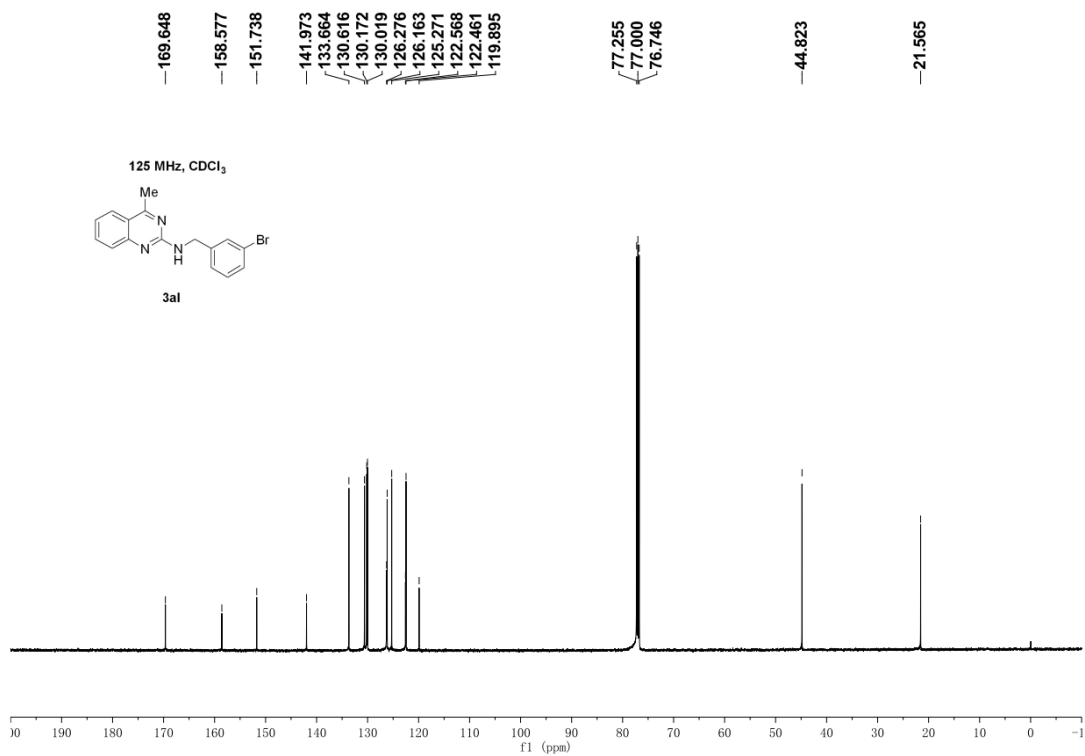

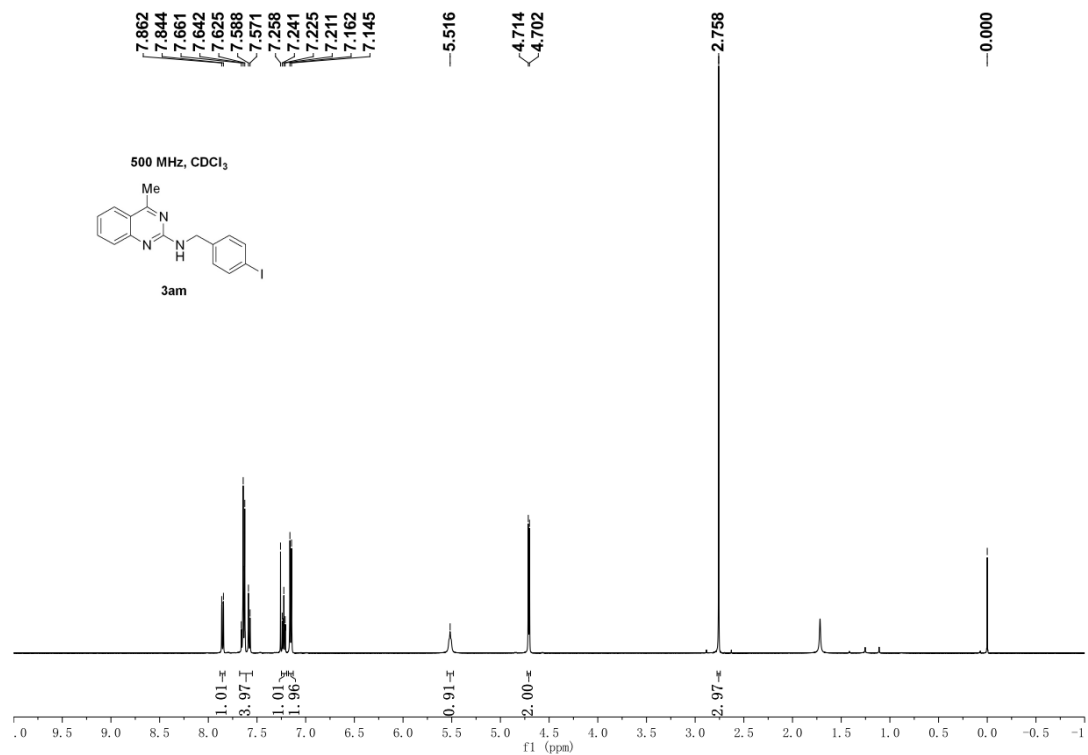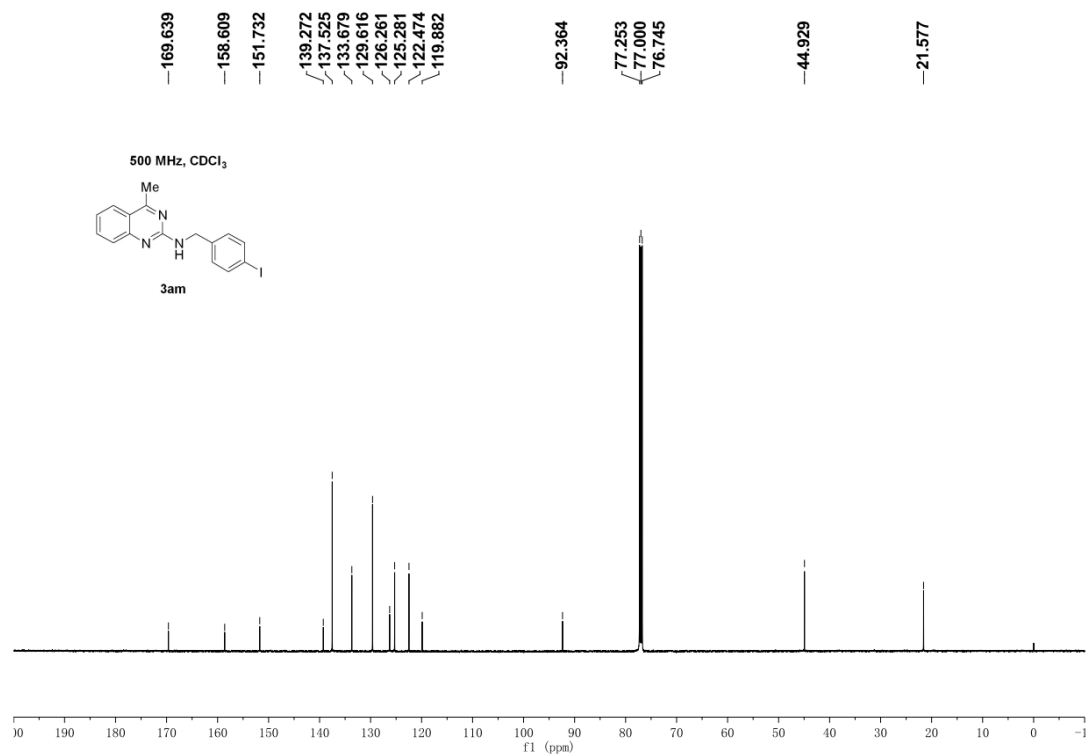

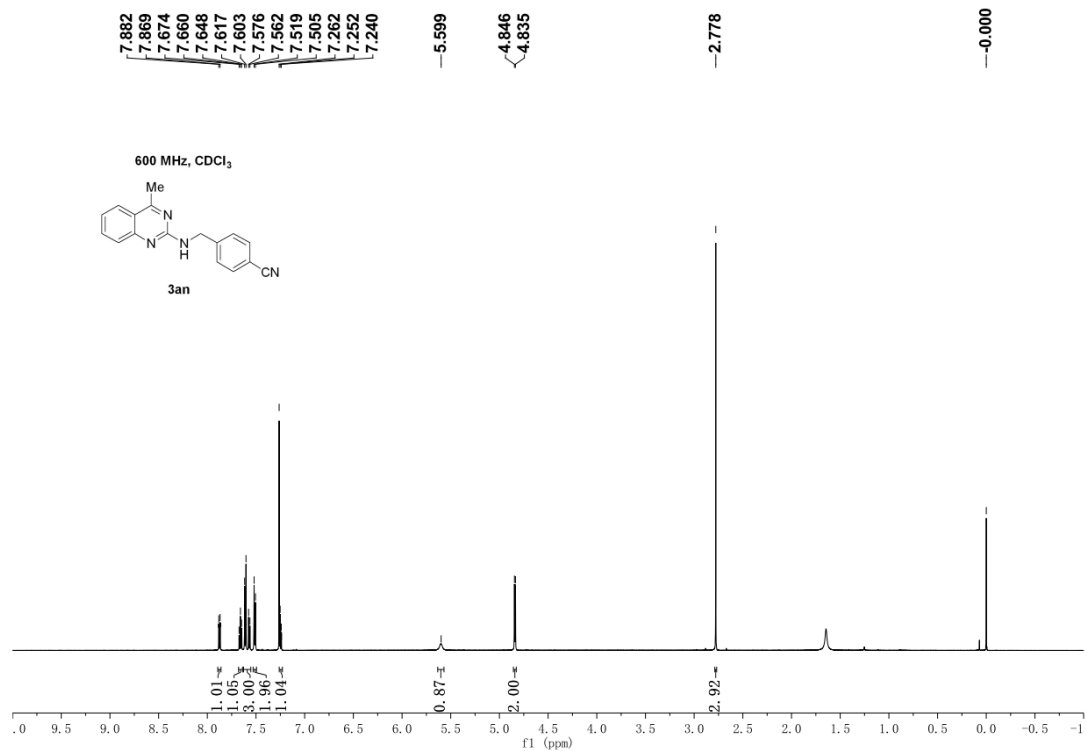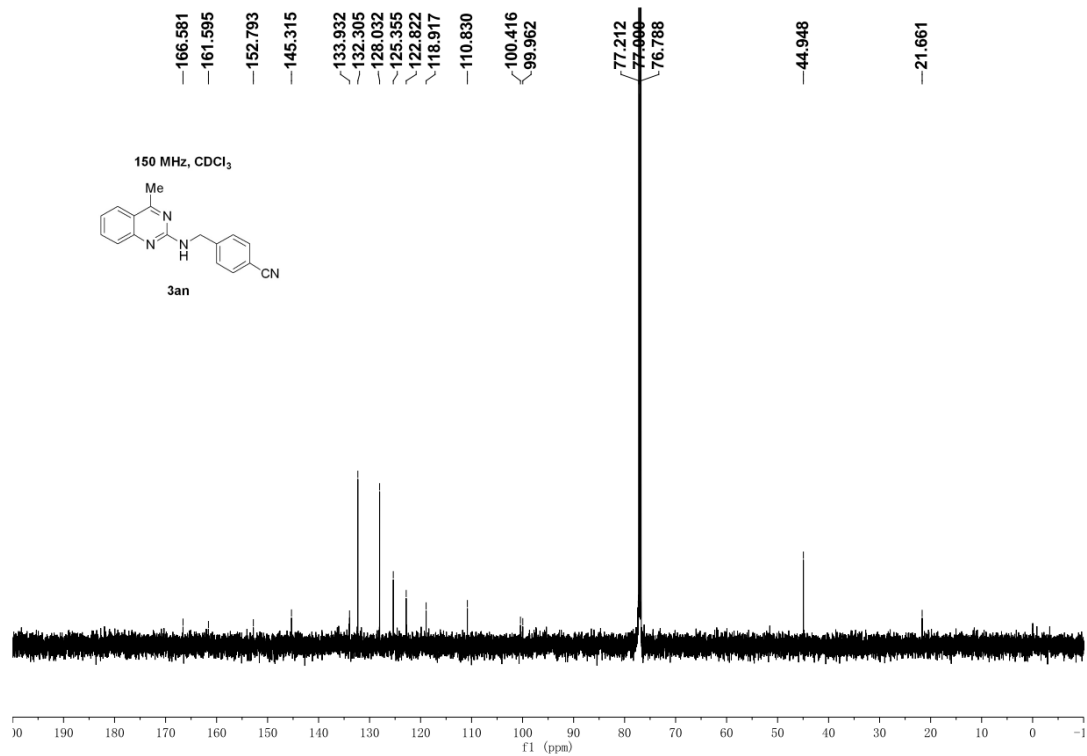

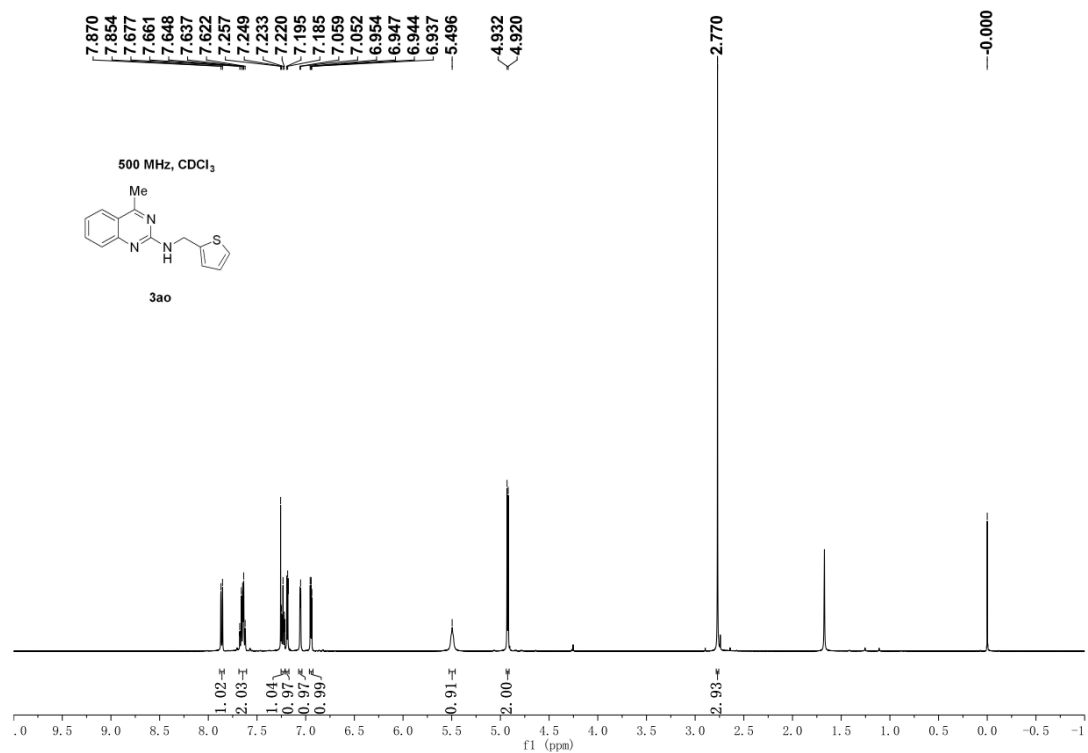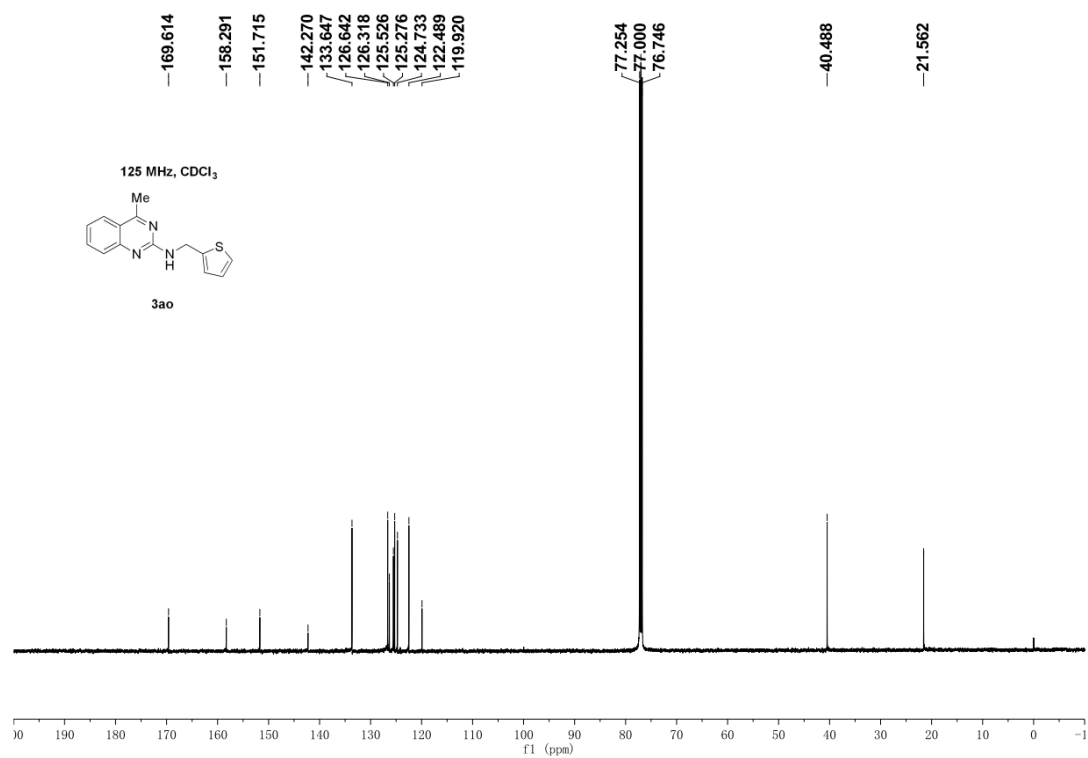



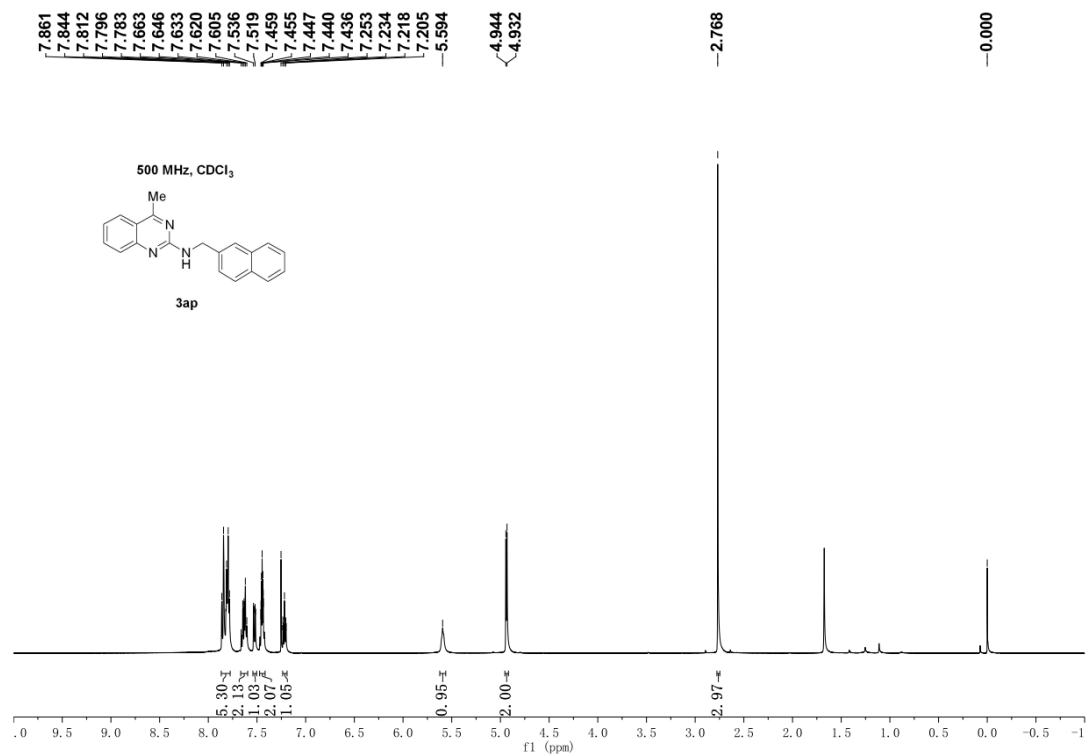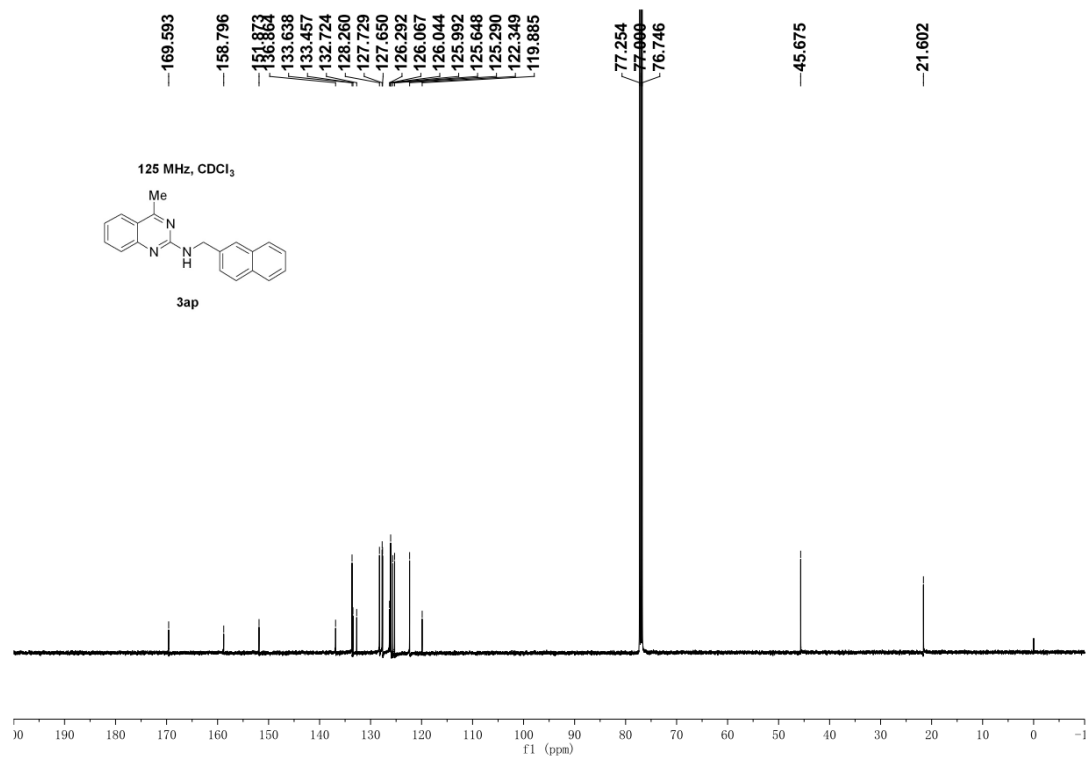

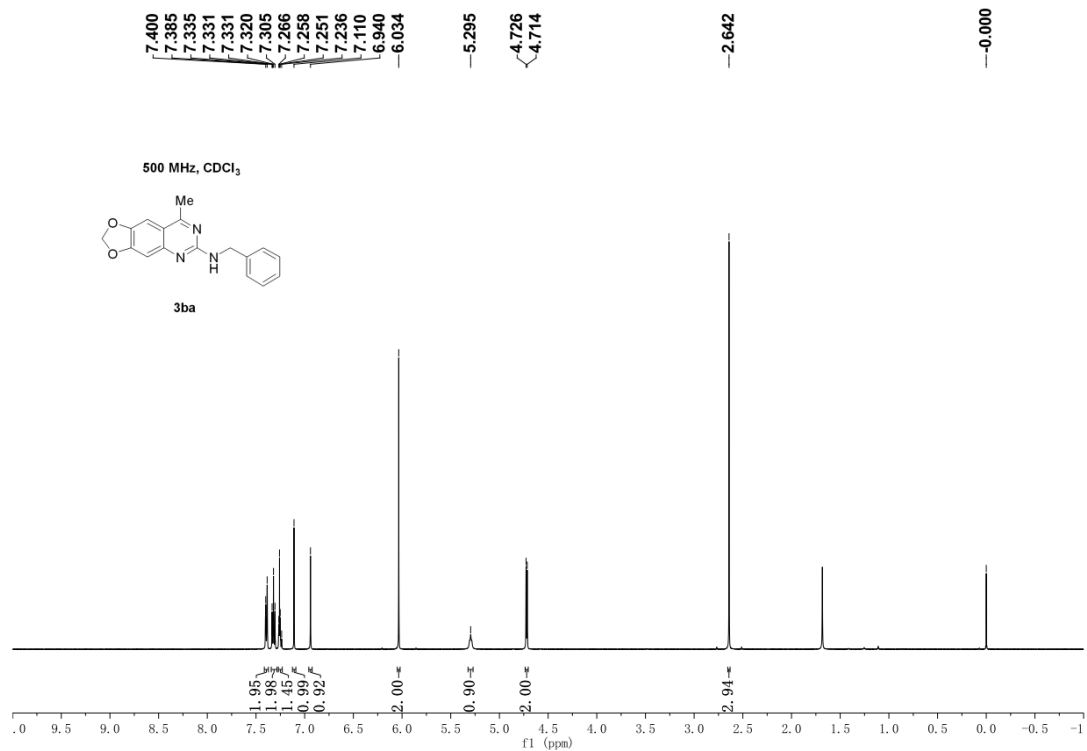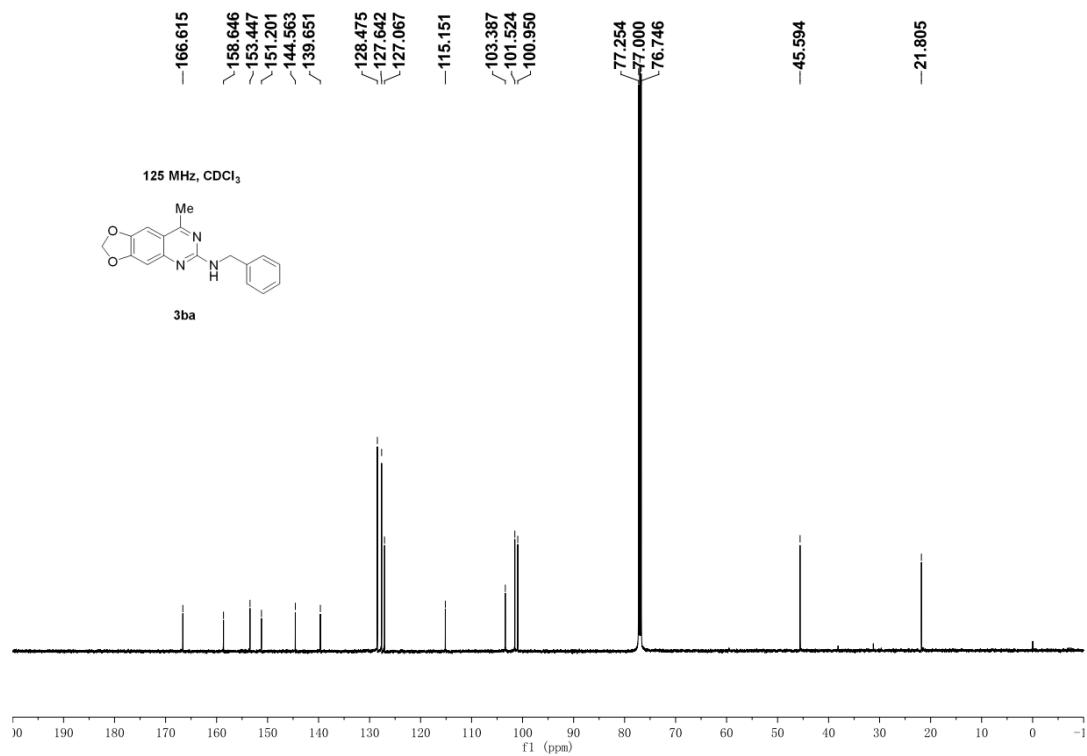

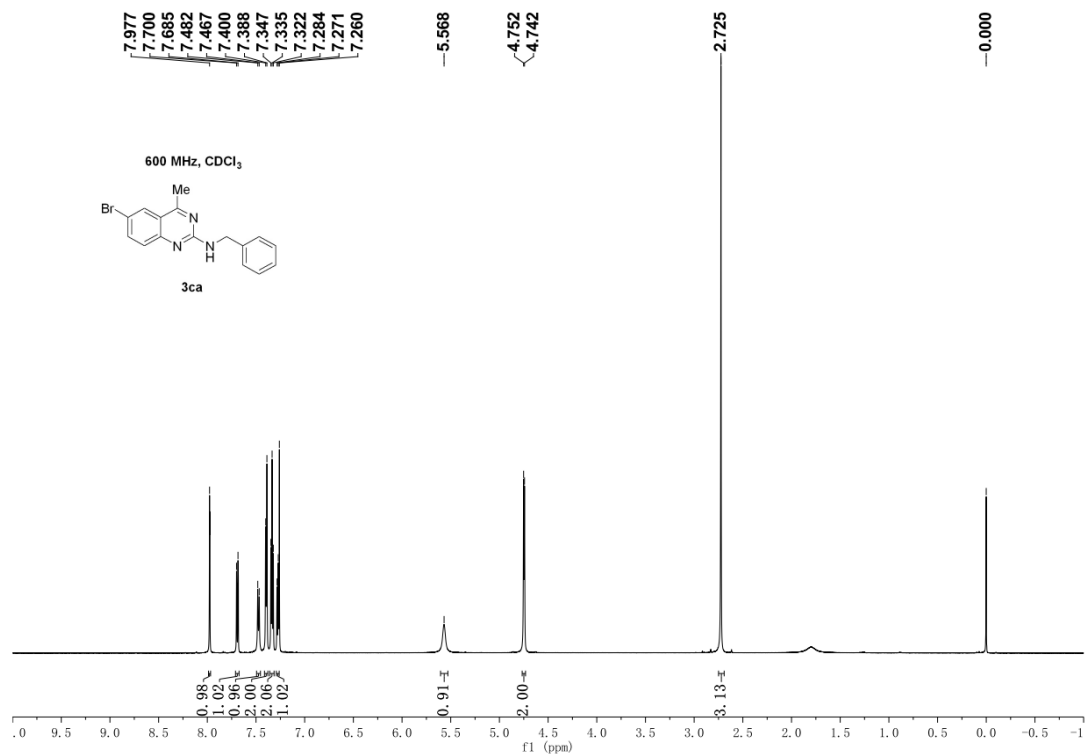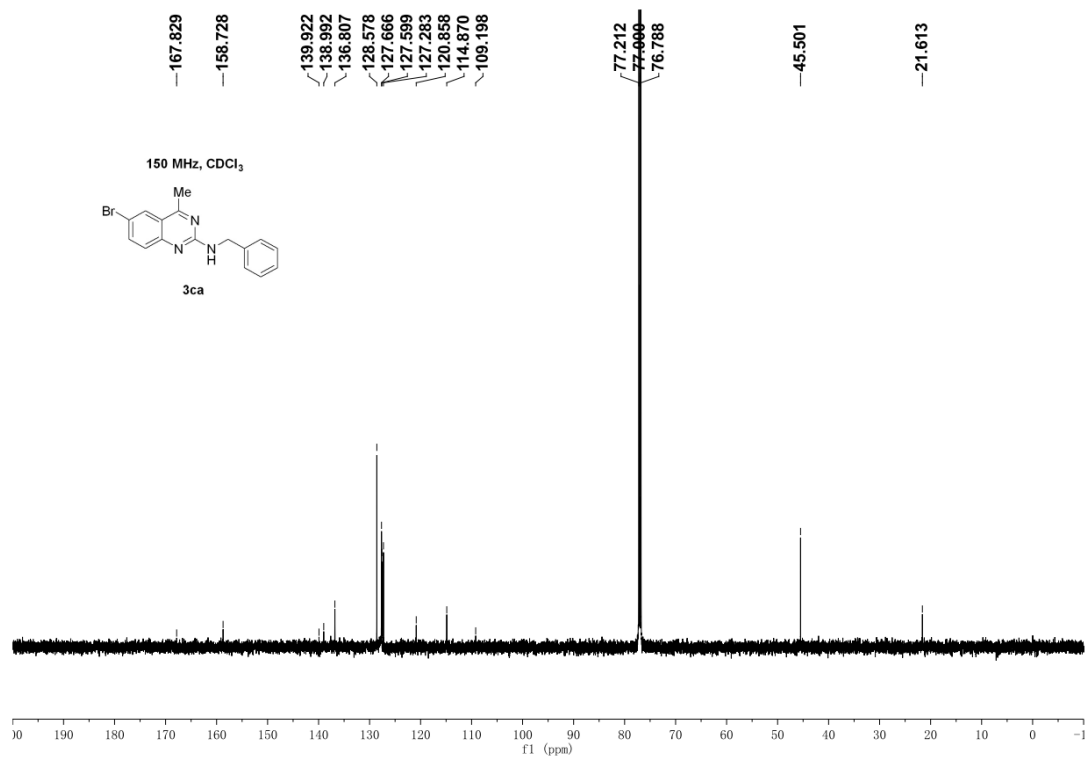

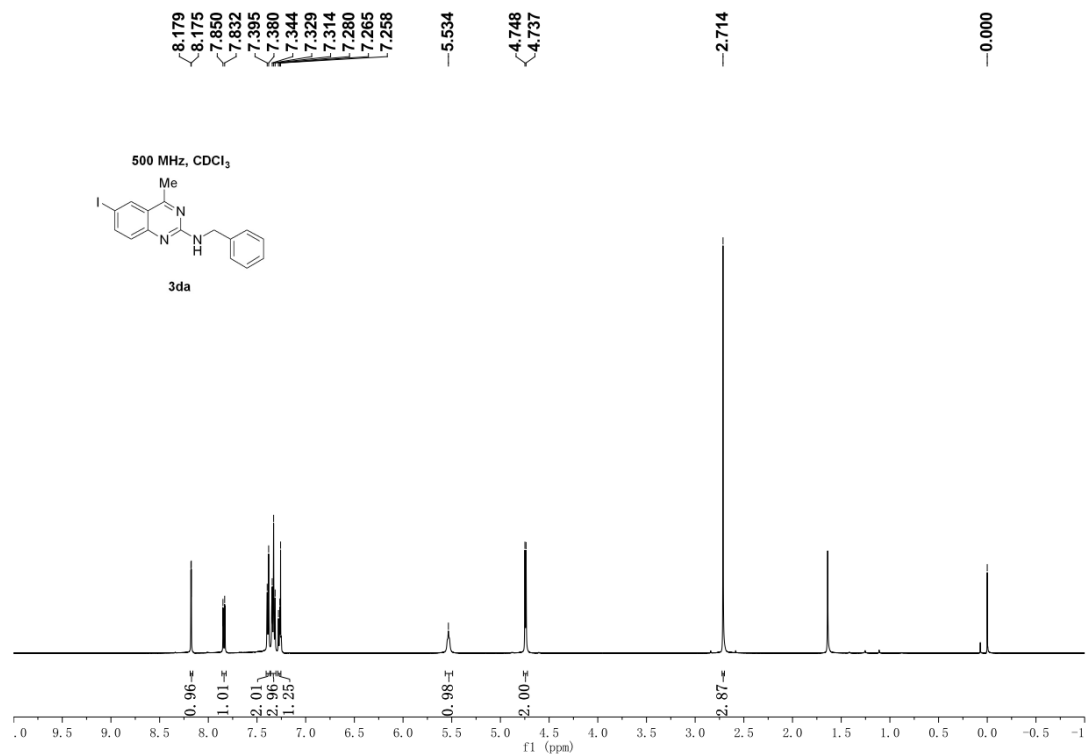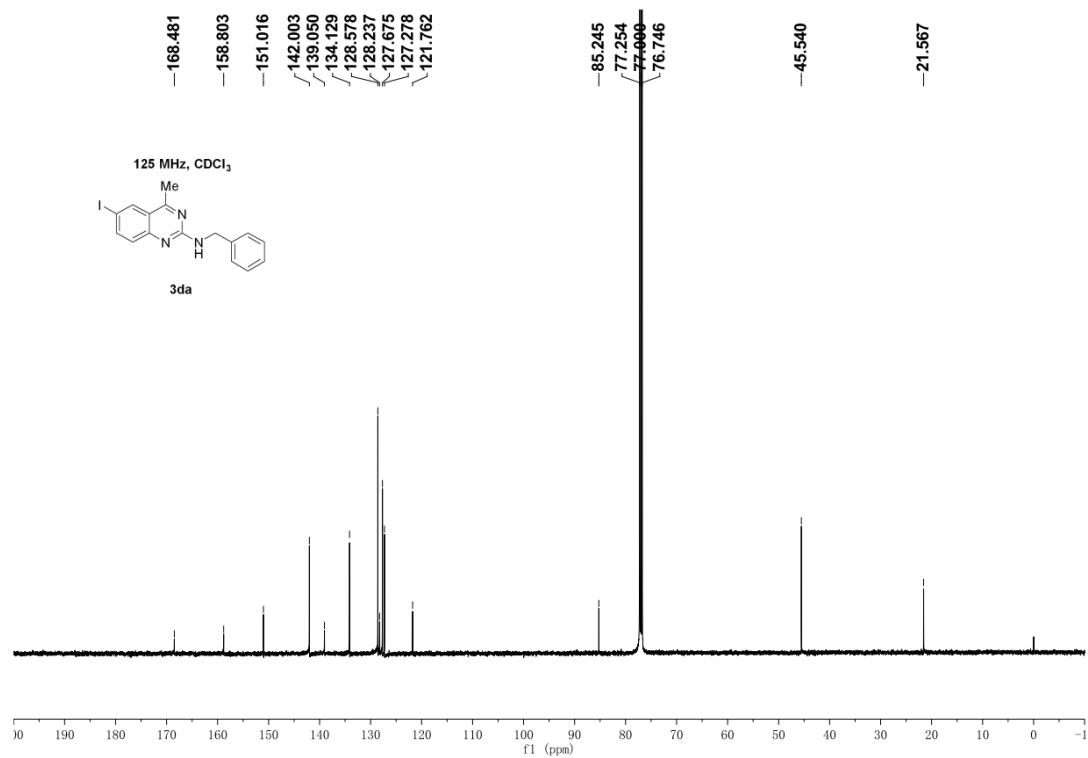

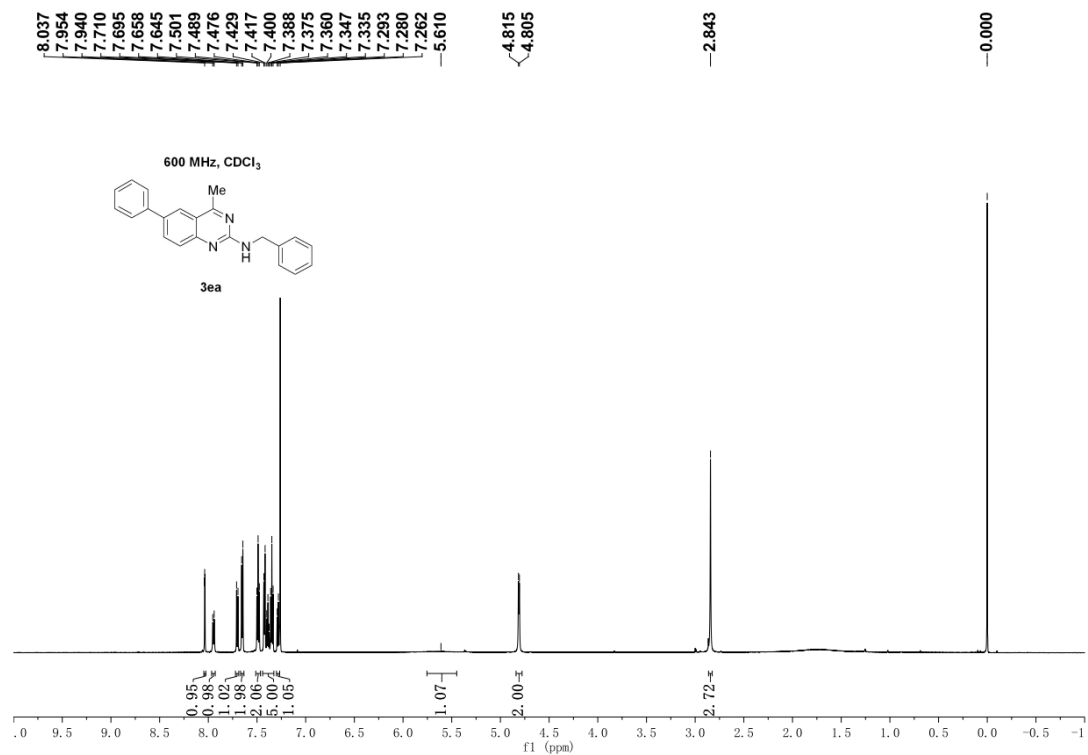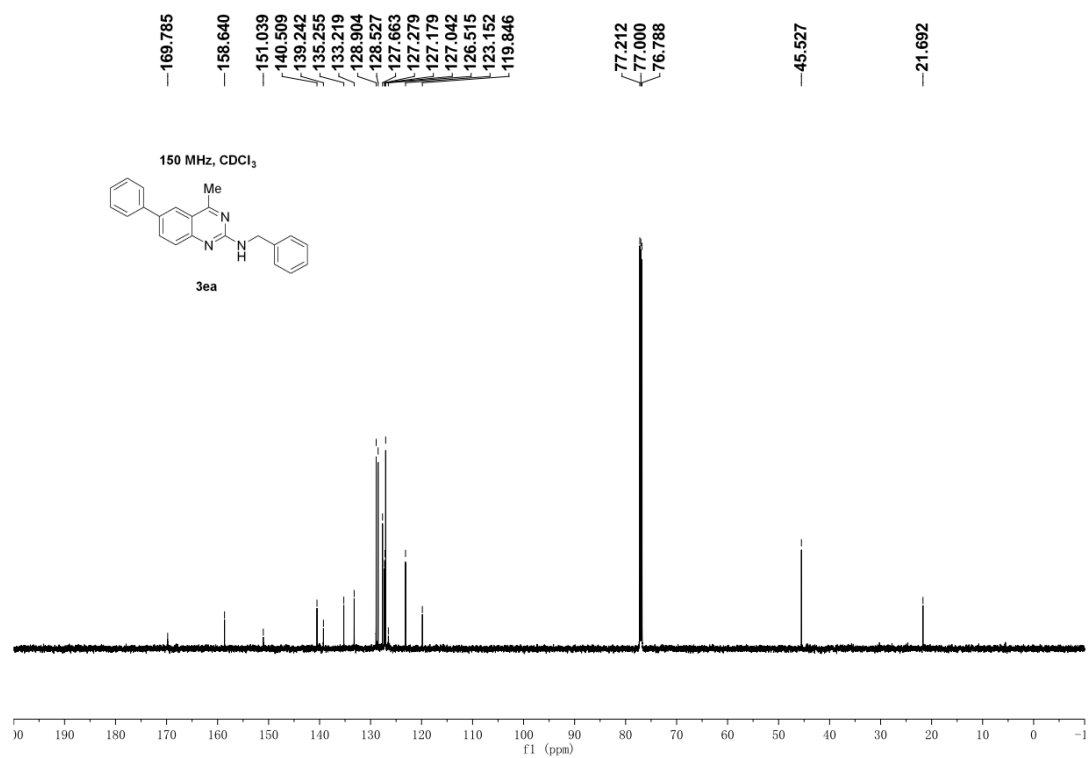

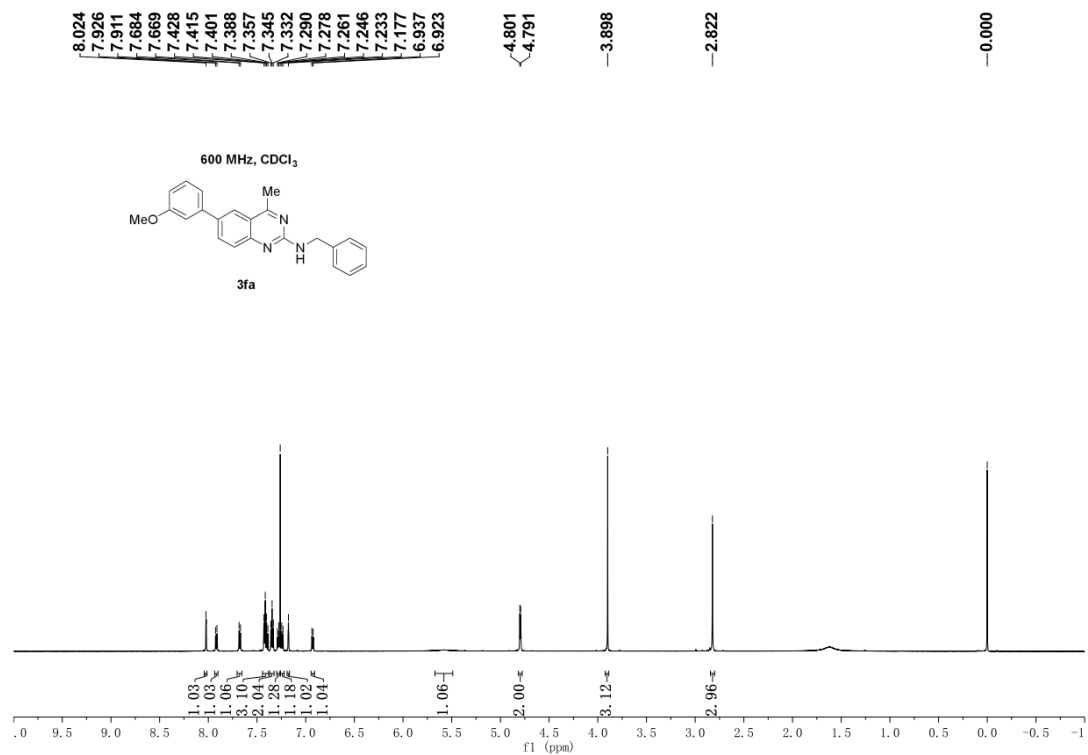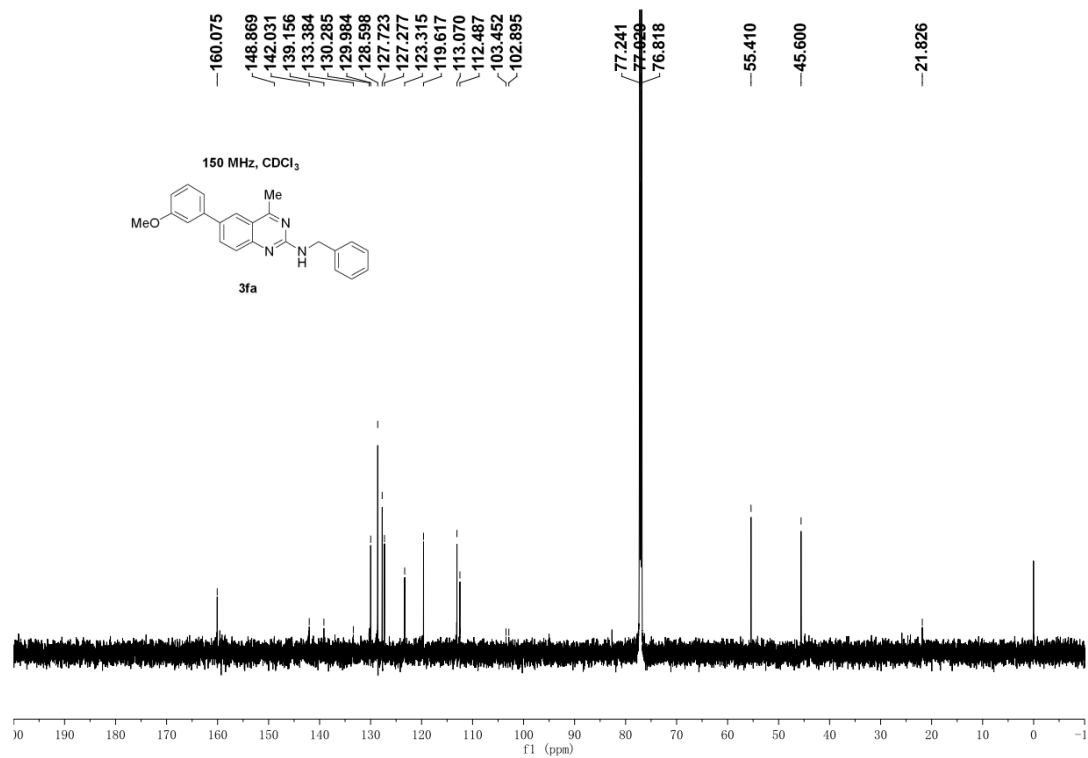

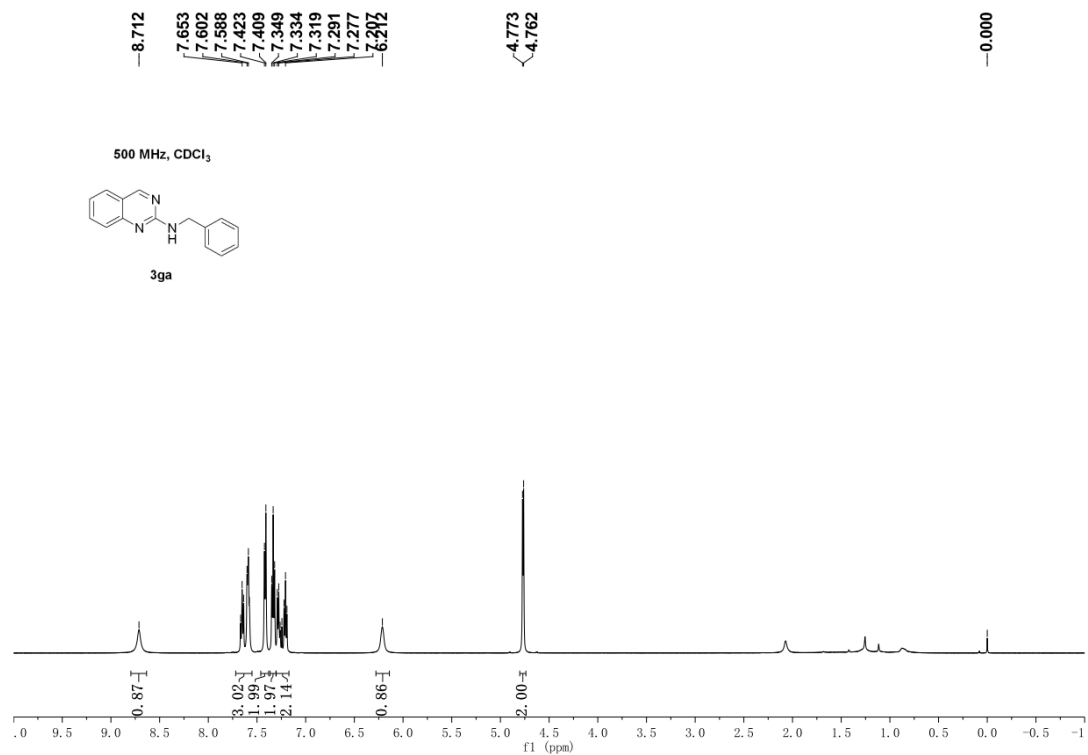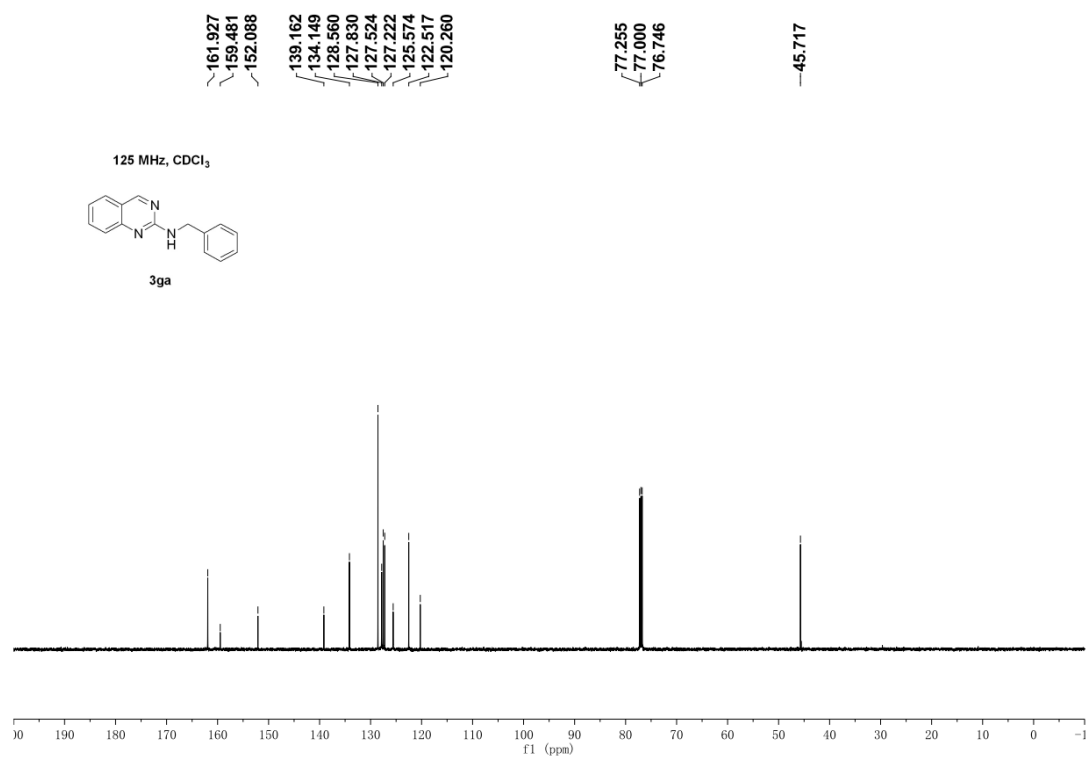

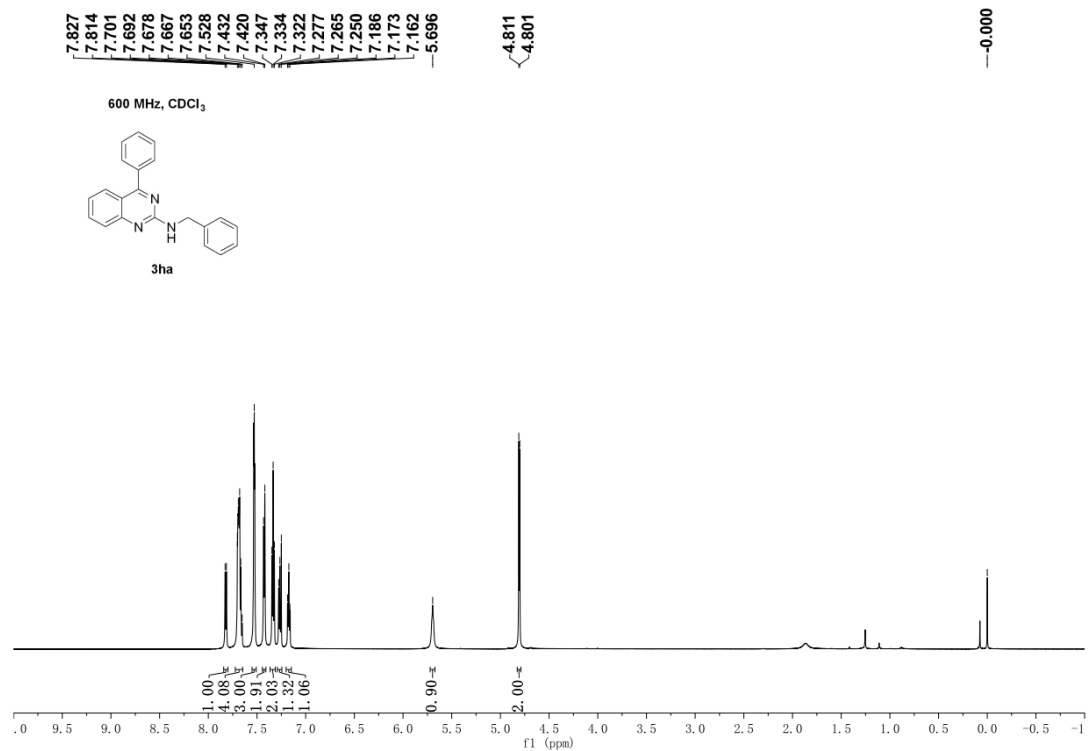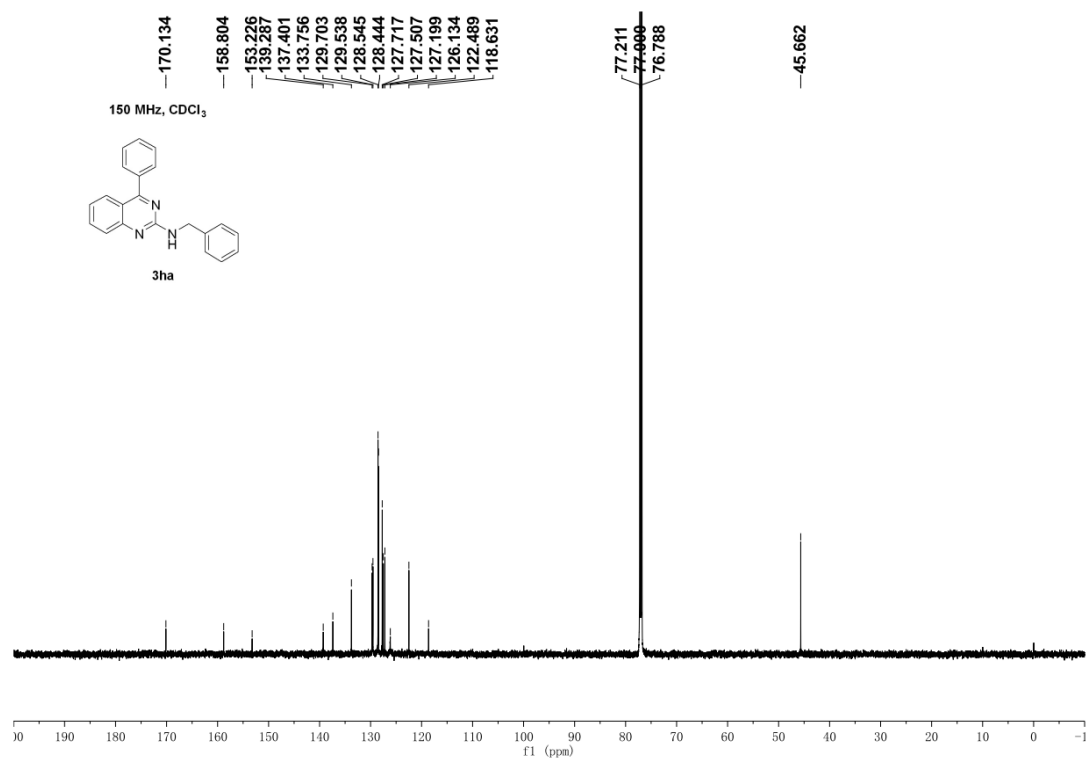



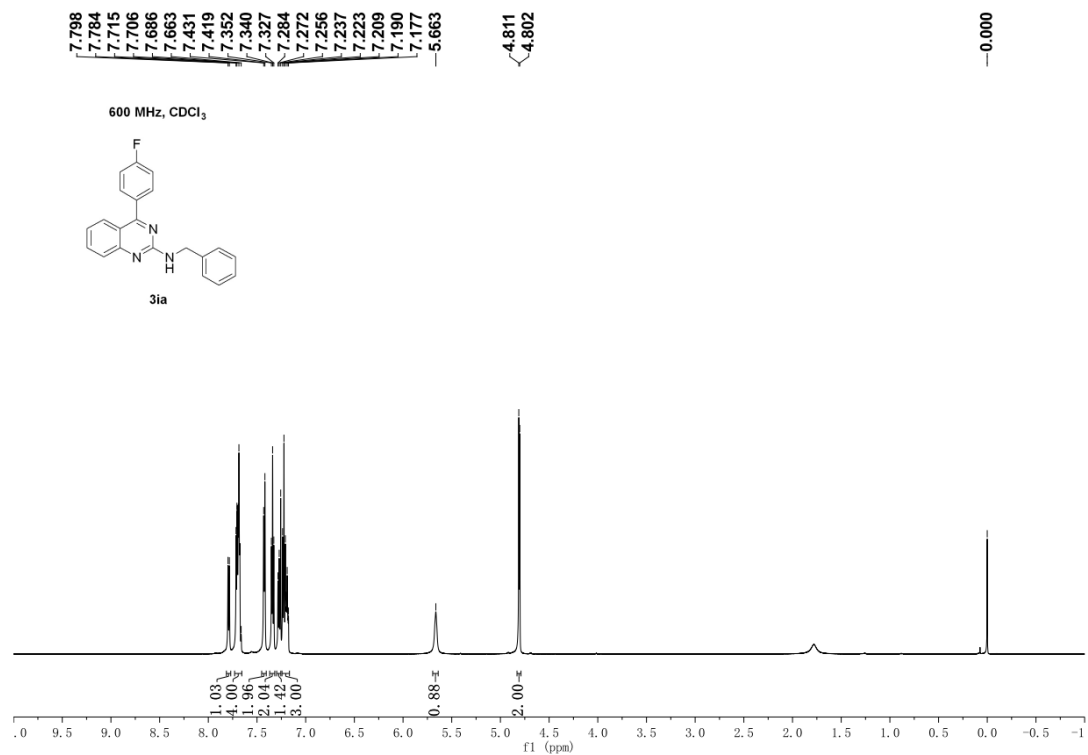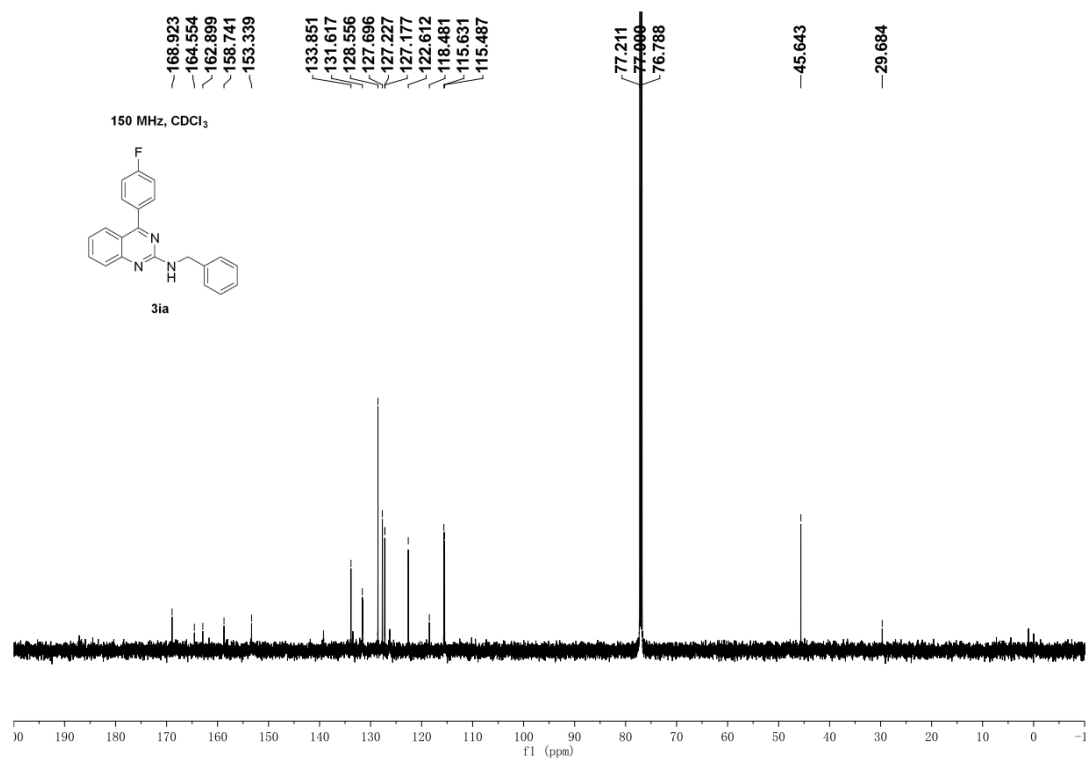

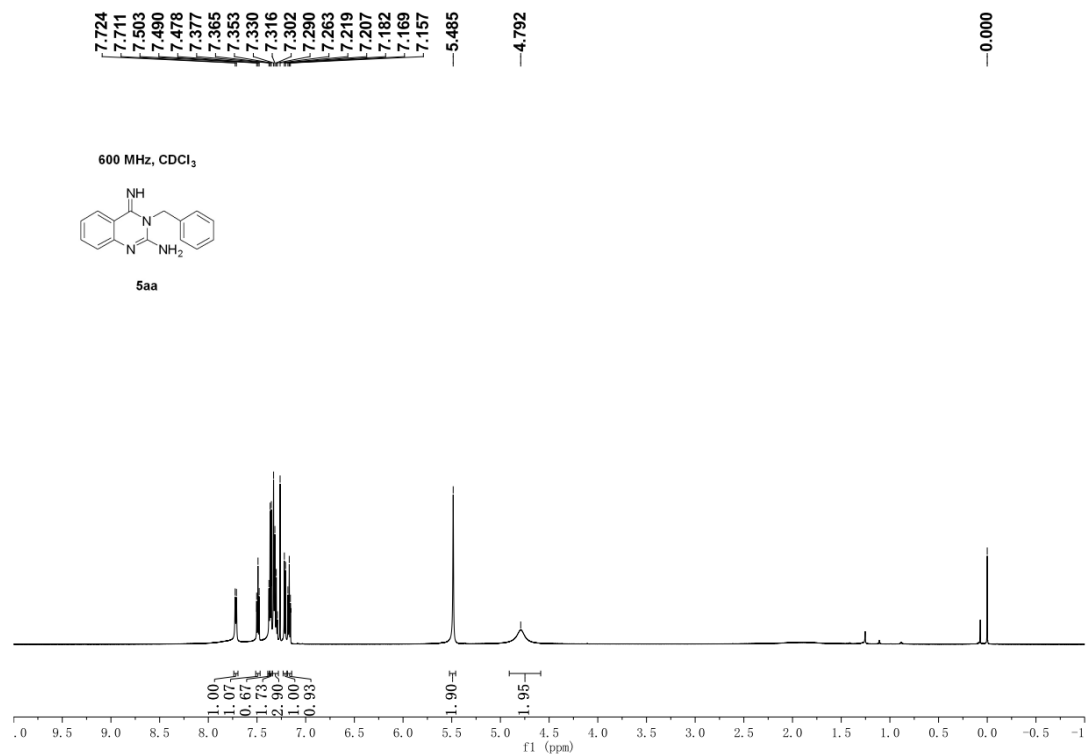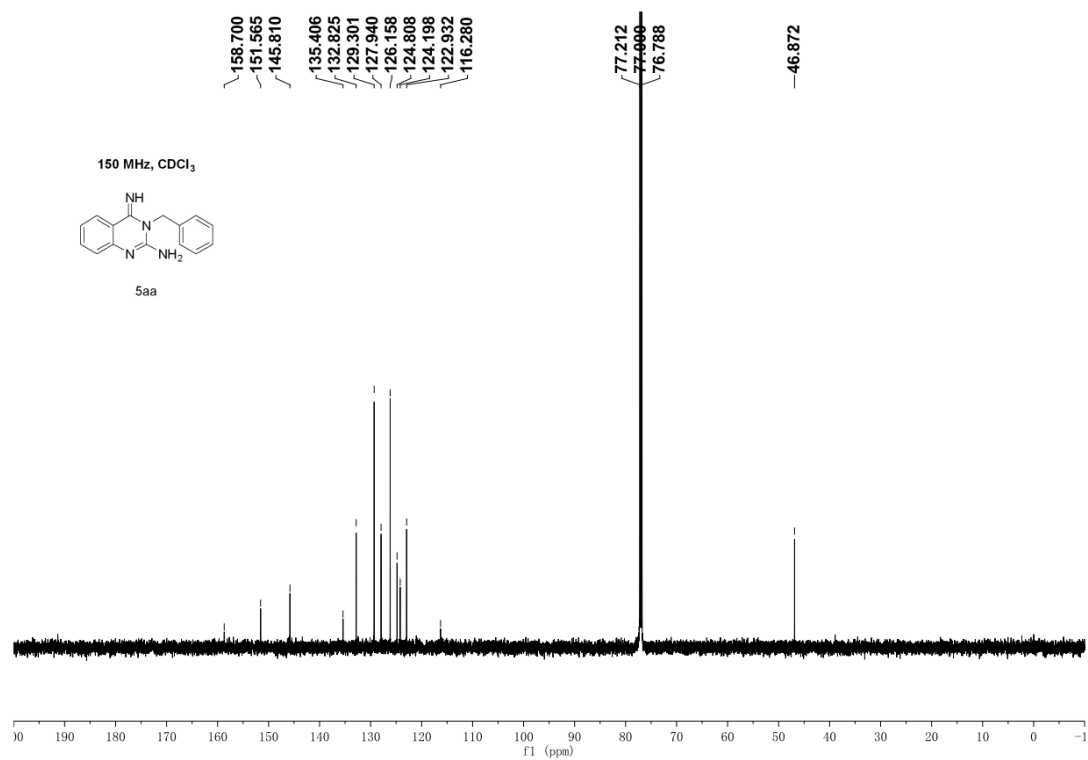

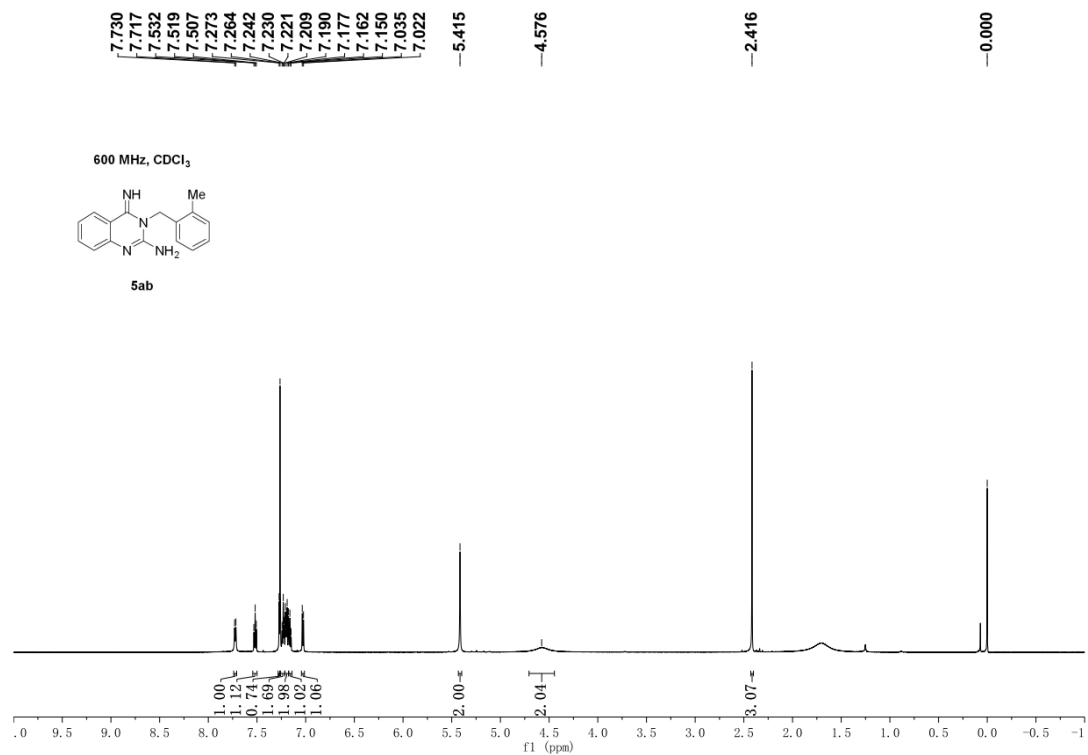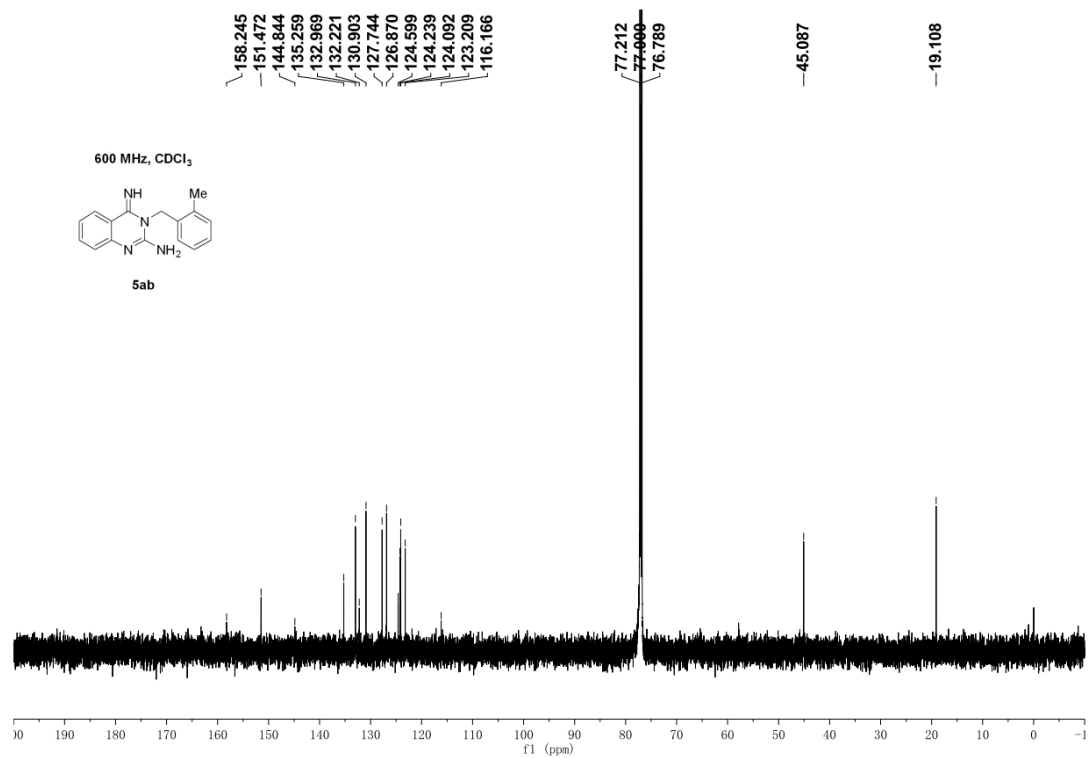

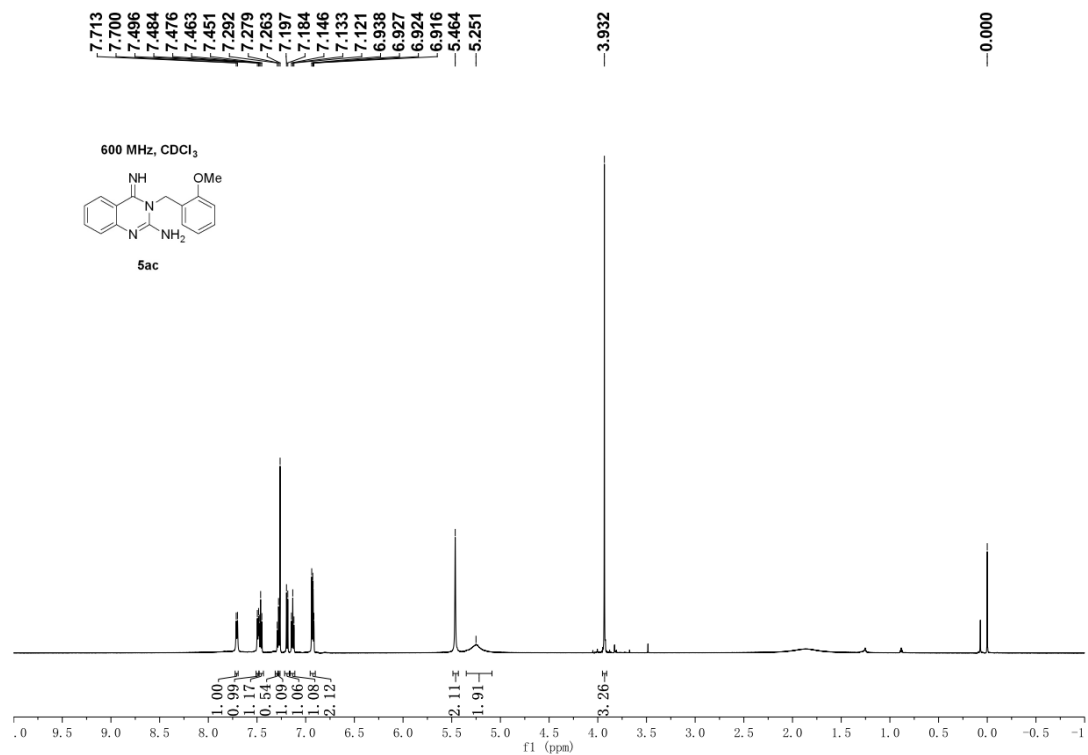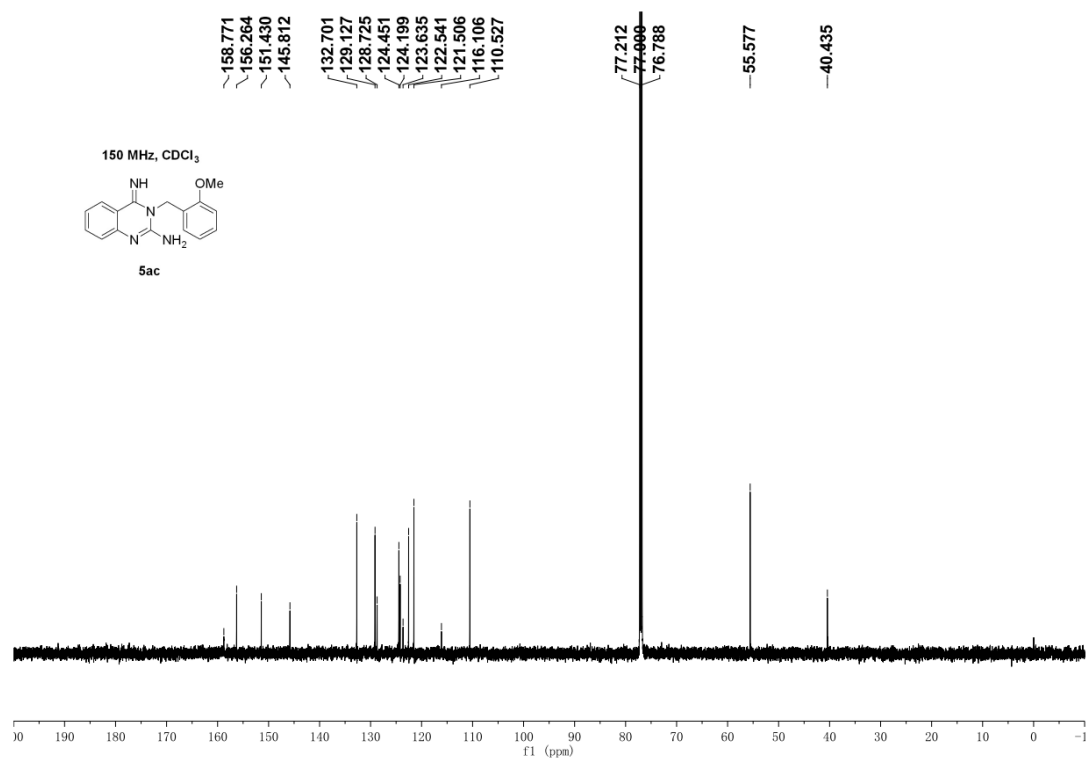

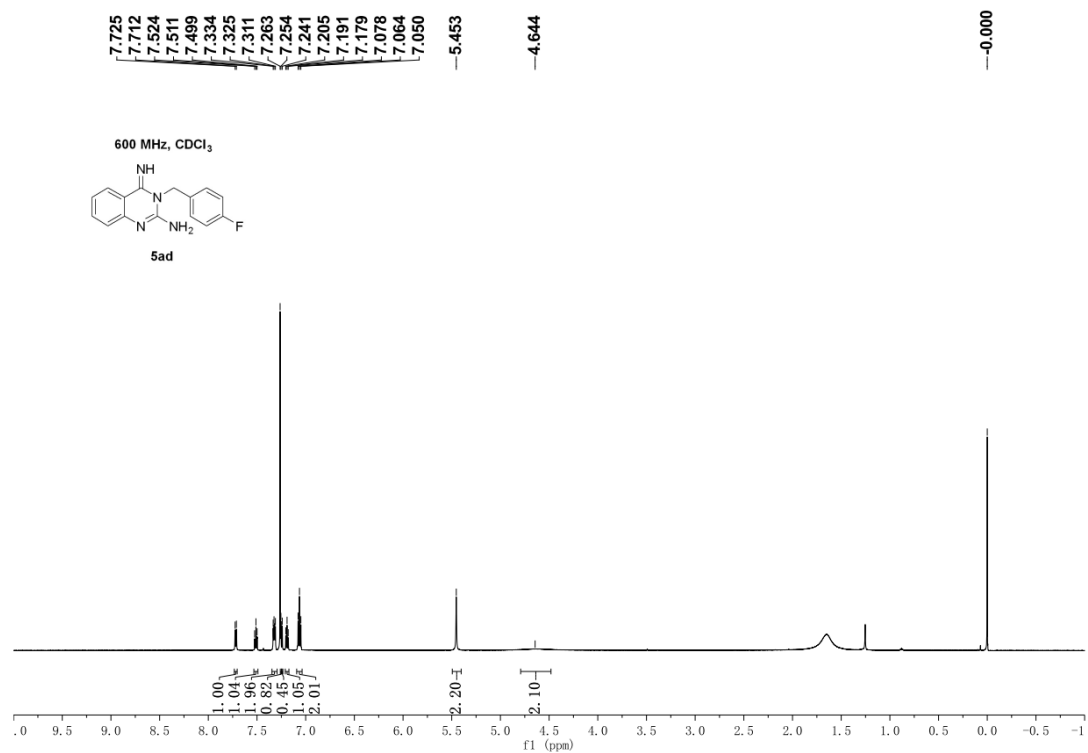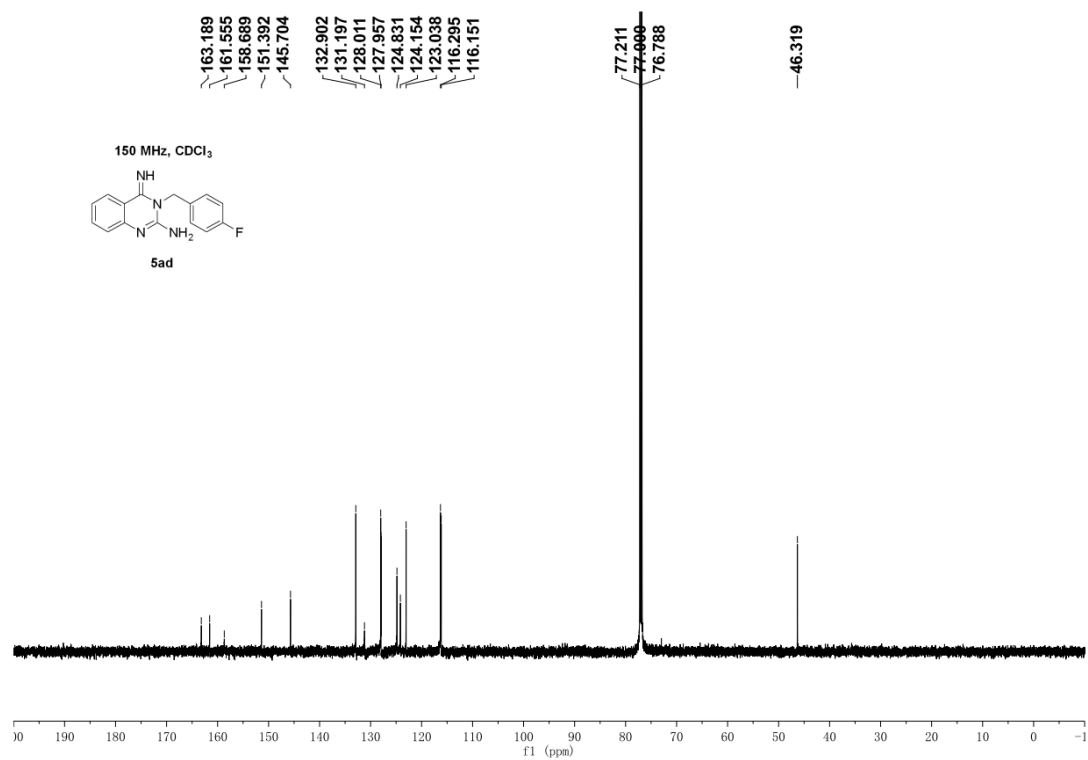

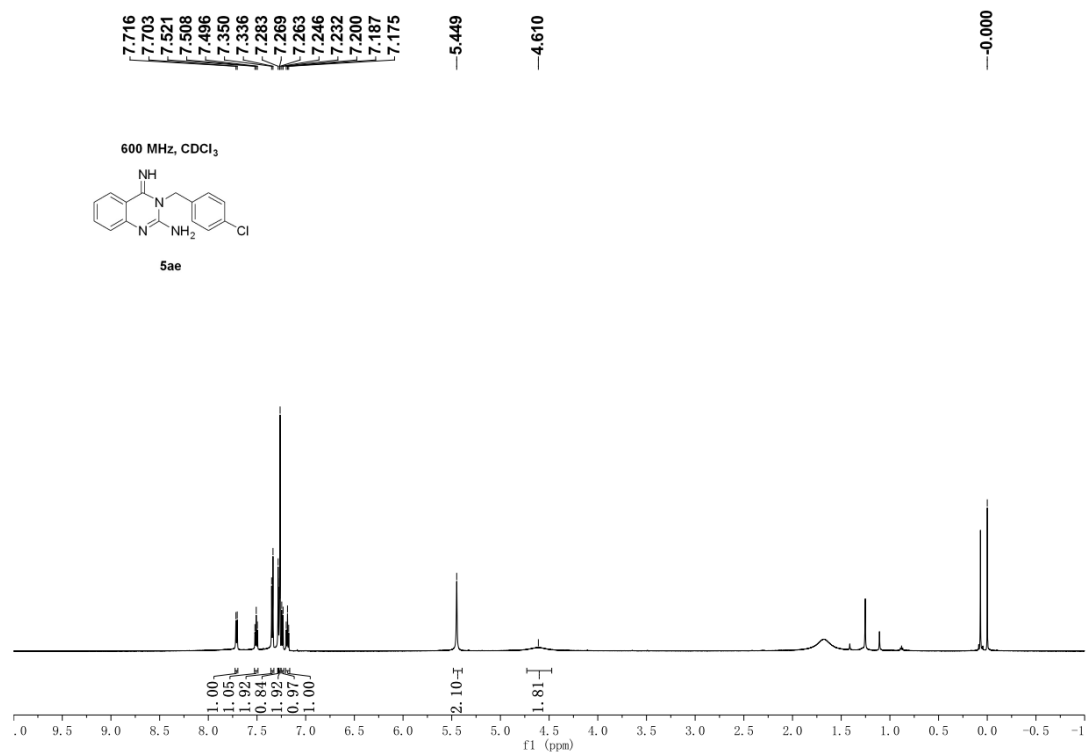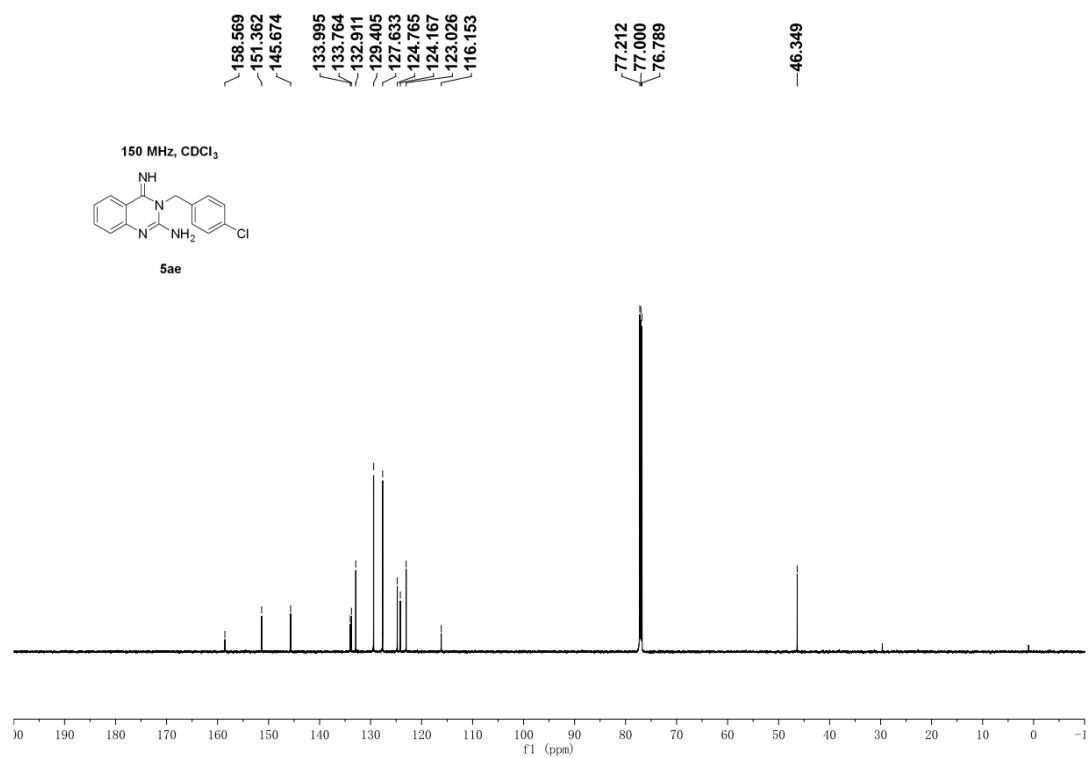

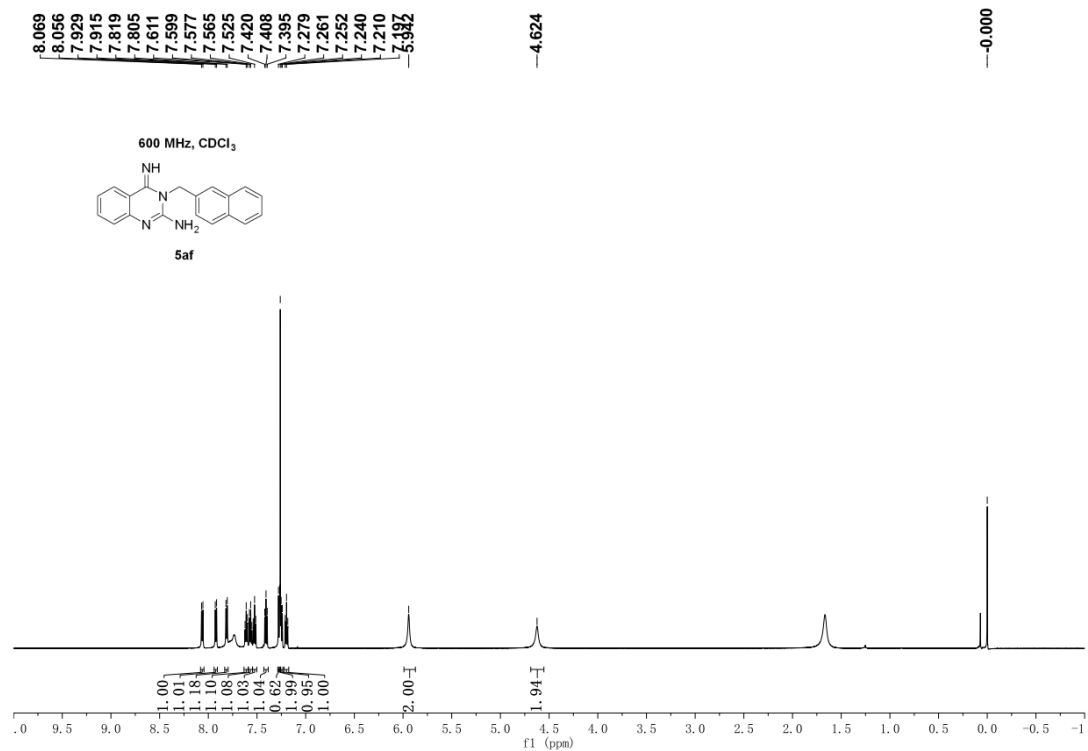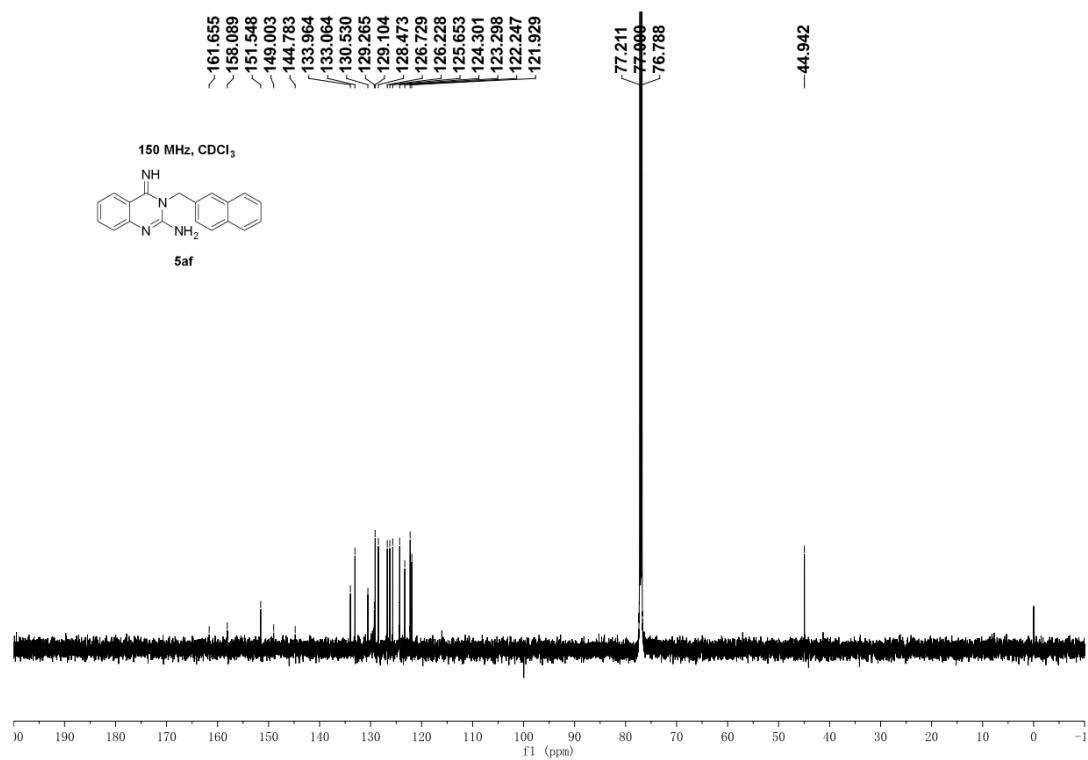

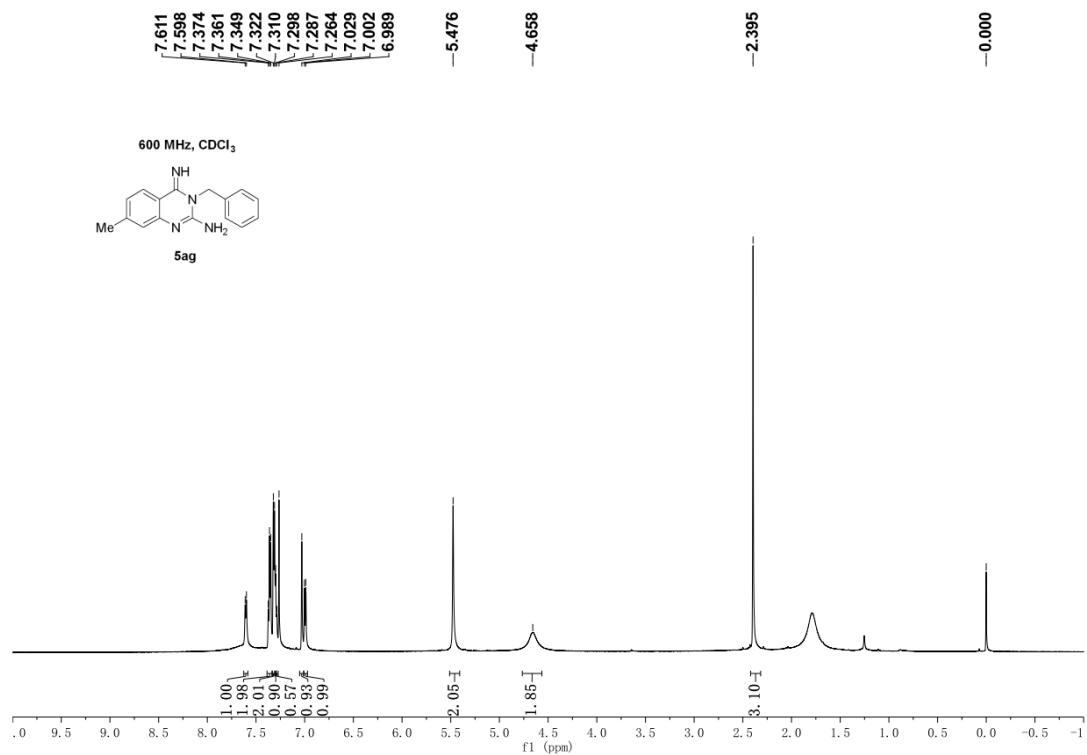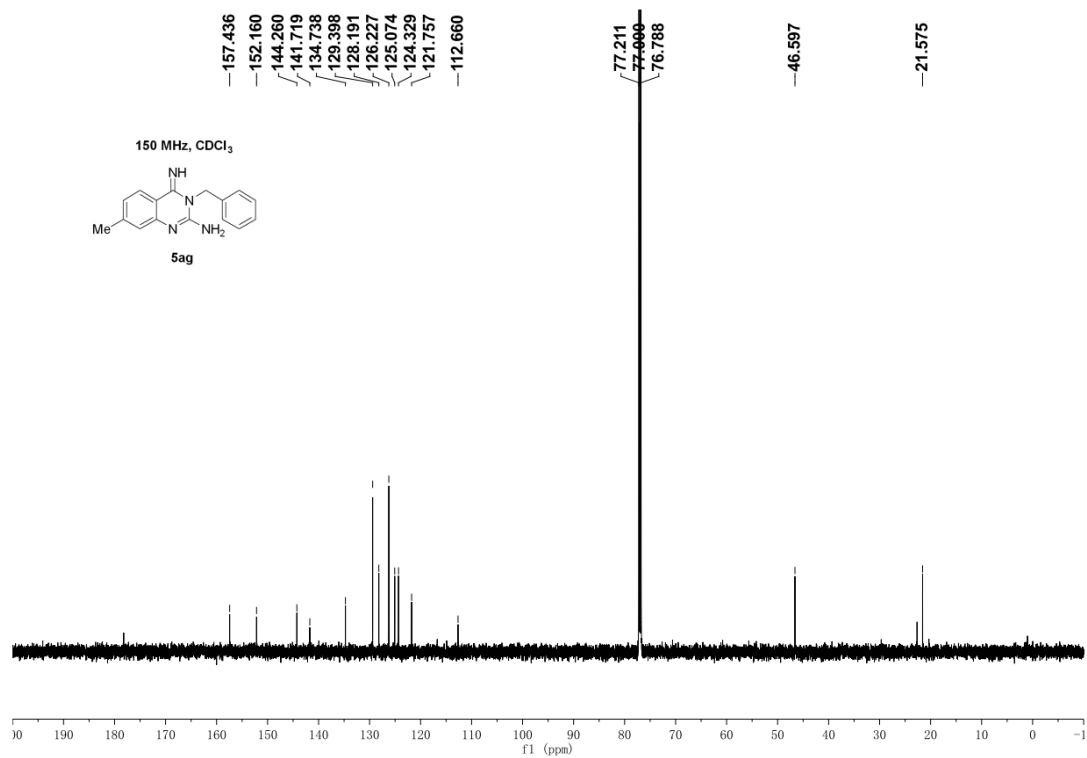



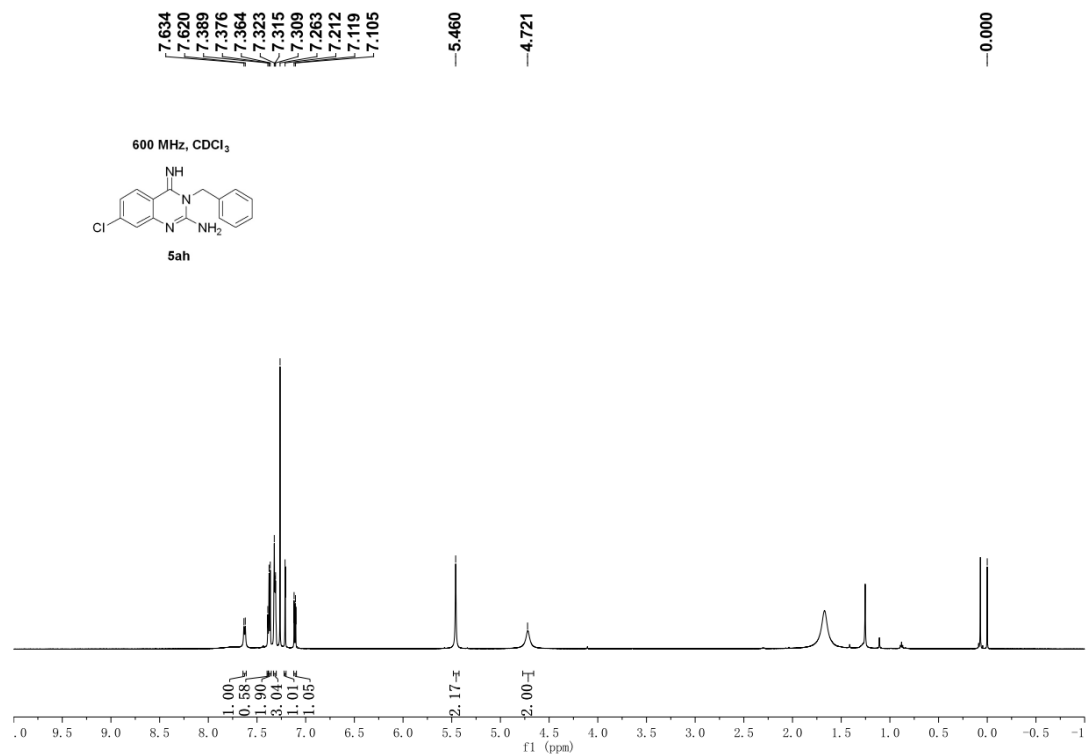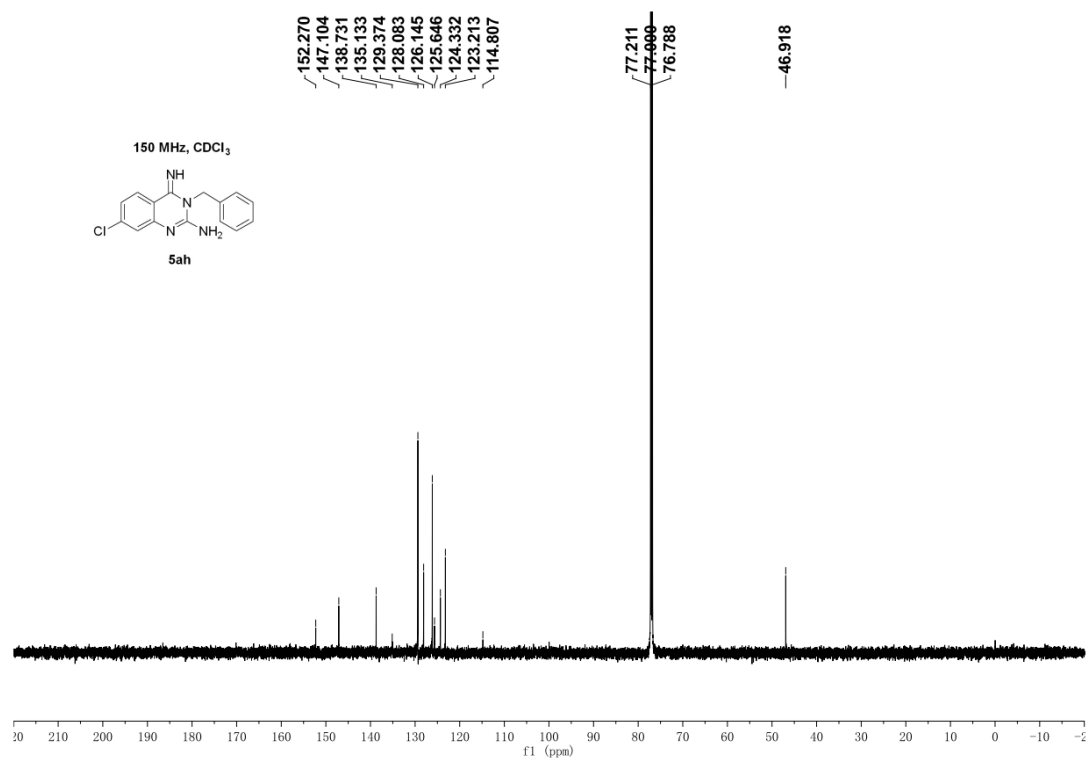

Supplement: s1 [file s1]
