# Supplementary material
Source: MDPI journal article supplement (https://www.mdpi.com/2073-4344/13/11/1447)
Supplement: s1 [file s1]

Archive with 2 entries (2 files):
- catalysts-2668482-supplementary file S1.pdf
- catalysts-2668482-supplementary file S2.pdf
