# Supplementary material
Source: MDPI journal article supplement (https://www.mdpi.com/2073-4344/13/11/1447)
Supplement: s1 [file s1 › catalysts-2668482-supplementary file S1.pdf]

## The Crystallographic Data

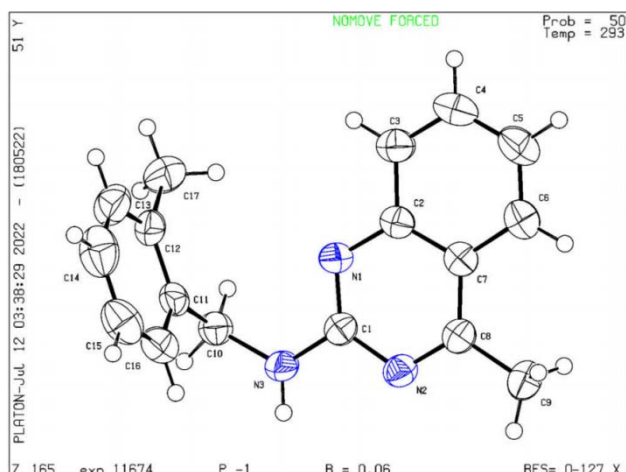

The purified compound **3aa** is dissolved in a mixed solvent of acetonitrile,  $\text{CHCl}_3$ , EtOAc and EtOH, placed in a dark cabinet to slowly evaporate. After several days, a white bulk crystal is obtained. The X-ray crystal-structure determinations were obtained on a Bruker APEX DUO CCD system.

**Table S1.** The crystallographic data of **3aa** (CCDC: 2294005).

|                                               |                                                                                                                                                                                      |
|-----------------------------------------------|--------------------------------------------------------------------------------------------------------------------------------------------------------------------------------------|
| Identification code                           | exp_11674                                                                                                                                                                            |
| Empirical formula                             | $\text{C}_{17}\text{H}_{17}\text{N}_3$                                                                                                                                               |
| Formula weight                                | 263.33                                                                                                                                                                               |
| Temperature                                   | 293(2)                                                                                                                                                                               |
| Crystal system                                | triclinic                                                                                                                                                                            |
| Space group                                   | P-1                                                                                                                                                                                  |
| Unit cell dimensions                          | $a = 7.6755(14) \text{ \AA}$ $\alpha = 88.372(14)^\circ$ .<br>$b = 8.2355(15) \text{ \AA}$ $\beta = 72.051(16)^\circ$ .<br>$c = 11.482(2) \text{ \AA}$ $\gamma = 85.342(15)^\circ$ . |
| Volume                                        | $688.2(2) \text{ \AA}^3$                                                                                                                                                             |
| Z                                             | 2                                                                                                                                                                                    |
| $\rho_{\text{calc}}/\text{g/cm}^3$            | 1.271                                                                                                                                                                                |
| $\mu/\text{mm}^{-1}$                          | 0.077                                                                                                                                                                                |
| F (000)                                       | 280.0                                                                                                                                                                                |
| Crystal size                                  | $0.2 \times 0.12 \times 0.09 \text{ mm}^3$                                                                                                                                           |
| Radiation                                     | Mo $\text{K}\alpha$ ( $\lambda = 0.71073$ )                                                                                                                                          |
| $2\theta$ range for data collection/ $^\circ$ | 4.962 to 54                                                                                                                                                                          |
| Index ranges                                  | $-9 \leq h \leq 9$ , $-10 \leq k \leq 10$ , $-14 \leq l \leq 14$                                                                                                                     |
| Reflections collected                         | 5825                                                                                                                                                                                 |
| Independent reflections                       | 2941 [ $R_{\text{int}} = 0.0370$ , $R_{\text{sigma}} = 0.0657$ ]                                                                                                                     |
| Data / restraints / parameters                | 2941/0/183                                                                                                                                                                           |
| Goodness-of-fit on $F^2$                      | 1.029                                                                                                                                                                                |
| Final R indices [ $I > 2\sigma(I)$ ]          | $R_1 = 0.0598$ , $wR_2 = 0.1290$                                                                                                                                                     |
| R indices (all data)                          | $R_1 = 0.1004$ , $wR_2 = 0.1571$                                                                                                                                                     |
| Largest diff. peak and hole                   | 0.15 and $-0.24 \text{ e.\AA}^{-3}$                                                                                                                                                  |

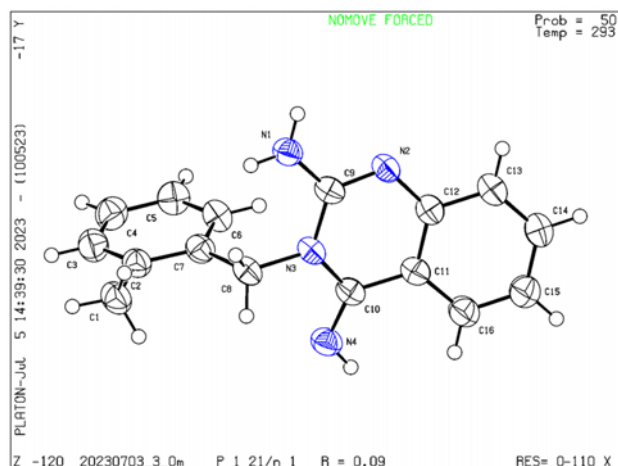

The purified compound **5ab** is dissolved in a mixed solvent of acetonitrile,  $\text{CHCl}_3$ , EtOAc and EtOH, placed in a dark cabinet to slowly evaporate. After several days, a white bulk crystal is obtained. The X-ray crystal-structure determinations were obtained on a Bruker APEX DUO CCD system.

**Table S2.** The crystallographic data of **5ab** (CCDC: 2294029).

|                                               |                                                                                                                                                                      |
|-----------------------------------------------|----------------------------------------------------------------------------------------------------------------------------------------------------------------------|
| Identification code                           | 20230703_3_0m                                                                                                                                                        |
| Empirical formula                             | $\text{C}_{16}\text{H}_{16}\text{N}_4$                                                                                                                               |
| Formula weight                                | 264.33                                                                                                                                                               |
| Temperature                                   | 293.30                                                                                                                                                               |
| Crystal system                                | monoclinic                                                                                                                                                           |
| Space group                                   | $P2_1/n$                                                                                                                                                             |
| Unit cell dimensions                          | $a = 11.3243(5) \text{ \AA}$ $\alpha = 90^\circ$ .<br>$b = 9.3817(4) \text{ \AA}$ $\beta = 108.821(2)^\circ$ .<br>$c = 13.5342(6) \text{ \AA}$ $\gamma = 90^\circ$ . |
| Volume                                        | $1361.01(10) \text{ \AA}^3$                                                                                                                                          |
| Z                                             | 4                                                                                                                                                                    |
| $\rho_{\text{calc}}/\text{g/cm}^3$            | 1.290                                                                                                                                                                |
| $\mu/\text{mm}^{-1}$                          | 0.080                                                                                                                                                                |
| F (000)                                       | 560.0                                                                                                                                                                |
| Crystal size                                  | $0.2 \times 0.14 \times 0.12 \text{ mm}^3$                                                                                                                           |
| Radiation                                     | Mo $K\alpha$ ( $\lambda = 0.71073$ )                                                                                                                                 |
| $2\theta$ range for data collection/ $^\circ$ | 5.382 to 52.718                                                                                                                                                      |
| Index ranges                                  | $-14 \leq h \leq 13, 0 \leq k \leq 11, 0 \leq l \leq 16$                                                                                                             |
| Reflections collected                         | 2729                                                                                                                                                                 |
| Independent reflections                       | 2729 [ $R_{\text{int}} = ?$ , $R_{\text{sigma}} = 0.0559$ ]                                                                                                          |
| Data / restraints / parameters                | 2729/0/183                                                                                                                                                           |
| Goodness-of-fit on $F^2$                      | 1.080                                                                                                                                                                |
| Final R indices [ $I > 2\sigma(I)$ ]          | $R_1 = 0.0942$ , $wR_2 = 0.2251$                                                                                                                                     |
| R indices (all data)                          | $R_1 = 0.1218$ , $wR_2 = 0.2544$                                                                                                                                     |
| Largest diff. peak and hole                   | 0.34 and $-0.42 \text{ e.\AA}^{-3}$                                                                                                                                  |
